# Supplementary material for: Analysis of clinical parameters of different types of α-thalassemia children in Hainan region, China
Source: PeerJ. 2026 Jan 8;14:e20586. doi: 10.7717/peerj.20586 (PMC12790785; doi:10.7717/peerj.20586)
Supplement: Supplemental Information 1 — All the information of the collected data and contains four tables, each of which is for different groups of information. The baseline information represented by numbers is described below, and the rest are the numerical values of clinical testing items, whose units have been shown in detail in the table 1–7. Note: Nation, Han = 1,Hui = 2, Li = 3, Miao = 4 Gender: boy = 1, girl = 2 [file peerj-14-20586-s001.xlsx]

## Sheet: Normal group
Nationa	Heiht/m	Weight/kg	Gender	Ageyears	WBC	RBC	HGB	HCT	PLT	MCV	MCH	MCHC	RWDSD	RWDCV	NEcount	NEratio	LYMcountA	LYMratio	MONcount	MONratio	Eocount	EOratio	Bacount	BAratio	PLCR	MPV	PDW	PCT	GLU	K	Na	Cl	Ca	Mg	P	BUN	CREA	BUNNCR	CO2	UA	CYSC	AG	Osmoe	CK	CKMB	LDH	ALT	AST	AST/ALT
1	0.8	9.5	1	1	12.9	4.8	120	36	331	75.9	25.2	332	35.7	13.4	2.8	21.6	8.8	67.8	0.2	1.6	1.1	8.6	0	0.3	11.8	7.7	15.3	0.3	4.6	5.3	139.4	105.1	2.4	0.9	1.9	4.3	25.4	0.2	22.3	224	1.1	12	298.4	214	33	342	23	51	2.2
1	0.7	9.4	1	1	12.5	5.4	135	40.2	254	74.6	25	335	37.6	14.4	1.6	13	9.4	75.4	0.4	3.1	1	8.3	0	0.2	14.9	8.3	15.2	0.2	4.3	4.5	138.9	108.1	2.5	0.9	1.4	4	13.4	0.3	18.5	201	0.8	12.3	295.2	114	58.3	511	13	50	3.9
1	0.9	12.5	2	3	8	4.5	116	36.7	348	81.8	25.8	316	37.7	13.1	3.8	47.8	3.5	43.5	0.4	4.9	0.3	3.4	0	0.3	13.8	8.1	15.6	0.3	4.8	4.2	139.4	105.3	2.4	1	1.9	6.3	27.5	0.2	20.8	291	1	13.3	298.2	79	12.2	228	7	24	3.4
1	1.1	15	2	3	10.4	5.1	133	42	470	82	26	318	40	13.8	3.6	34.3	6	57.2	0.6	5.8	0.2	2.2	0	0.3	19.6	9	15.7	0.4	4.4	4.8	142	109.6	2.7	1	1.4	3	22.3	0.1	22.3	160	0.8	10.1	300.9	74	22.4	370	10	35	3.5
1	1.12	15.5	2	3	10.1	5.1	132	41.5	412	81.5	26	319	39.9	13.9	5.7	56.6	3.5	35	0.7	7.3	0.1	0.6	0	0.3	16.6	8.6	15.5	0.4	4.6	4.6	140.3	103.3	2.7	0.9	1.3	3.1	16.4	0.2	22.3	176	0.8	14.7	297.6	182	13.8	418	13	41	3.2
1	1.12	17	1	5	7.6	4.8	128	39.7	410	83.1	26.7	322	38.7	13.2	2.7	35.6	4	52.4	0.3	4.5	0.5	6.9	0	0.6	19.7	9.1	15.8	0.4	4.8	4.6	137.6	106	2.6	0.9	1.8	7.3	42.6	0.2	19.1	244	0.8	12.5	296.6	112	20.4	215	18	31	1.7
1	1.13	17.5	1	5	8.8	4.6	125	39	362	85.2	27.3	320	40.6	13.5	3.5	39.9	4.2	47.3	0.6	6.5	0.5	5.6	0.1	0.7	9.8	7.6	15.1	0.3	4.9	4.5	140.7	107.5	2.8	0.9	1.5	4.1	38.6	0.1	20.6	242	0.9	12.6	299.4	122	20	223	14	36	2.6
1	1.13	16	1	5	6.5	4.6	133	40	231	87.6	29.1	332	37.1	12.1	2	31.1	3.7	57.1	0.4	5.7	0.4	5.5	0	0.5	15	8.3	15.9	0.2	4.7	4.7	141.1	106.1	2.4	1	1.9	7	25.6	0.3	22.2	229	1.1	12.8	303.2	132	12.1	216	15	27	1.8
1	1.14	18	1	5	5.4	4.4	123	37.7	372	86.6	28.1	325	41	13.4	1.5	27.3	3.5	64	0.3	5.2	0.2	2.8	0	0.6	12.2	7.9	15.4	0.3	5.2	4	139.9	109.3	2.6	1	1.8	6.2	45.1	0.1	18	353	1	12.6	299.3	153	20.8	252	11	33	3
1	1.15	21	1	5	8.2	4.3	113	34.9	336	81.3	26.4	325	37.2	12.9	2.2	27.2	5.3	64.3	0.3	3.7	0.3	3.7	0.1	1.1	10.4	7.7	15.2	0.3	4.8	4.1	142.3	106.8	2.5	0.7	1.6	5.8	29.8	0.2	24.1	302	0.8	11.4	303.3	160	12.2	257	11	29	2.6
1	1.15	20	1	5	6.1	4.4	118	36.6	385	83.2	26.9	323	38.2	13	2.6	42.8	2.3	37.6	0.4	5.9	0.8	13.1	0	0.6	28.4	10.3	15.9	0.4	4.8	4.6	140.5	107.9	2.4	0.9	1.6	6.3	33	0.2	19.8	259	0.8	12.8	301.2	136	18.4	257	13	29	2.2
1	1.16	15	2	5	11.2	5	138	41.9	456	83.2	27.5	330	39.4	13.4	7.5	66.6	3	26.4	0.7	6.2	0.1	0.6	0	0.1	14.1	8.3	15.4	0.4	4.9	4.4	137.9	104.3	2.8	1	1.5	4.8	55.8	0.1	18.2	256	1.1	15.4	294.3	74	22.9	305	14	35	2.5
1	1.19	19	2	5	6.3	4.8	118	37.4	285	77.8	24.5	315	37.9	13.8	1.5	23.3	4.1	65.6	0.4	6.9	0.2	3.6	0	0.6	13.4	8	15.4	0.2	4.7	4.4	143.1	108.1	2.7	0.8	1.5	4.6	25.1	0.2	24	202	1	11	304.3	190	14.7	274	16	34	2.1
1	1.17	19	1	5	5	4.6	133	40.5	356	88.2	28.9	328	40.7	13.1	2	41.1	2.5	49.9	0.3	6.2	0.1	2.5	0	0.3	15.7	8.5	15.7	0.3	4.3	4.6	141.9	106	2.6	0.7	1.7	3.8	19.6	0.2	22.2	264	0.9	13.7	301.1	78	8.8	252	16	25	1.6
3	1.15	19	2	5	8.4	4.6	133	38.7	276	83.6	28.7	343	36.2	12.4	3.2	38.1	4.4	52	0.4	5	0.4	4.5	0	0.2	6.4	6.8	15.1	0.2	4.7	4.8	144.3	110.8	2.5	0.9	1.6	4.6	33	0.1	20.8	369	1	12.7	307.5	119	21.2	285	15	34	2.3
1	1.2	20	1	6	9.8	4.5	129	38.7	302	86.9	29	334	41.9	13.8	5.8	58.8	3.4	34.6	0.4	4.4	0.2	1.6	0.1	0.6	14.1	8.3	15.5	0.3	4.8	4.3	137.1	102.2	2.6	0.8	1.6	5.3	33.4	0.2	23.1	258	1	11.8	292.8	136	19.3	238	12	32	2.7
1	1.25	25.2	2	6	6.6	4.5	124	38.4	331	85.2	27.5	323	37.5	12.5	2.9	44.6	3	46	0.4	6	0.2	3.1	0	0.3	20.7	9.3	15.7	0.3	5	3.9	143.8	105.3	2.5	0.8	1.6	3.9	42.1	0.1	23.3	286	0.8	15.2	304.3	126	21.4	215	11	24	2.2
1	1.18	28	2	6	9.1	4.5	127	38.7	294	86.6	28.4	328	38.6	12.6	4	44.1	4.1	44.6	0.4	4	0.6	6.9	0	0.4	23.2	9.7	16	0.3	5.3	4.5	143.4	107.1	2.5	1.1	1.8	5.3	34.7	0.2	23.5	339	0.9	12.8	306.3	98	11.4	181	13	22	1.7
1	1.2	25	2	6	5.9	5	136	41	311	82.1	27.2	332	36.2	12.6	3.6	60.3	1.9	31.5	0.3	4.8	0.2	2.9	0	0.5	17.2	8.7	15.6	0.3	4.9	4.6	140.1	103.6	2.7	0.9	1.7	4.4	33.3	0.1	26	211	0.3	10.5	298.7	161	13.7	233	14	28	2
1	1.19	18	1	6	6	4.3	119	37.5	430	87.4	27.7	317	40.5	13.2	2.1	34.8	2.7	43.8	0.6	9.4	0.7	11.5	0	0.5	14.3	8.1	15.7	0.4	5.2	4.4	141.5	107.4	2.5	0.9	1.6	3.7	36.3	0.1	20.9	349	0.9	13.2	300.8	83	15.6	244	13	32	2.5
1	1.21	24	1	6	7.4	5	131	40.3	256	79.9	26	325	36.7	13.2	2.5	33.8	3.1	42	0.5	6.4	1.2	16.9	0.1	0.8	28.8	10.2	15.9	0.3	5.3	3.8	141.5	105.2	2.4	0.9	2	4.5	35.7	0.1	22.4	379	1	13.9	300.5	65	16.7	216	8	21	2.6
1	1.22	22	2	6	5	4.5	124	37.7	346	84.6	27.8	329	38	12.8	1.8	36.2	2.7	54.2	0.3	5.6	0.2	3.4	0	0.6	9.6	7.5	15.3	0.3	5.1	4.2	141.1	106.4	2.6	1	1.8	3.2	39.6	0.1	17.5	276	0.9	17.2	299	126	14	202	11	28	2.6
1	1.19	22	1	6	6.3	4.9	125	38.9	371	79	25.5	323	37.2	13.4	2.3	35.9	3.5	55	0.4	6.5	0.1	2.1	0	0.4	9.1	7.3	15.2	0.3	4.8	4.3	141.3	106.3	2.6	0.9	1.3	4.5	29.7	0.2	18.4	382	0.9	16.6	300.5	142	17.1	335	25	45	1.8
1	1.25	21	2	6	8.4	5	133	40.6	330	81.3	26.7	328	35.7	12.6	3.1	36.6	4.6	54.4	0.4	5.3	0.3	3.1	0.1	0.6	16.6	8.6	15.6	0.3	4.9	4.8	141.4	106.4	2.5	1.1	1.7	3.8	32.1	0.1	23.7	281	0.9	11.3	301	113	13.4	218	14	29	2.1
1	1.3	25	1	6	7.2	4.7	139	41.4	300	88.8	29.8	336	38.7	12.5	3	41	3.5	48.5	0.5	6.5	0.3	3.5	0	0.5	15.7	8.5	15.7	0.3	4.7	4.1	140.6	108.6	2.7	0.9	1.7	3.2	35.1	0.1	20.8	395	0.8	11.2	297.4	111	20.6	208	13	27	2.1
1	1.29	21.5	1	6	11.8	4.7	132	40.4	353	86.6	28.4	328	39.7	13	4.6	39.2	5.1	43.2	0.5	3.8	1.6	13.2	0.1	0.5	21.5	9.4	15.9	0.3	4.5	4.2	138.5	105.5	2.7	0.9	1.7	5.1	41.7	0.1	21.1	299	1	11.9	295	139	37.4	265	12	33	2.8
1	1.15	20	2	6	6.4	5	133	40.7	239	81.6	26.6	326	38.9	13.5	3	46.4	2.9	45.2	0.4	5.5	0.2	2.7	0	0.2	18.9	8.9	15.6	0.2	4.3	4.2	142	106.3	2.5	0.8	1.6	3.9	25.8	0.2	25.1	287	0.8	10.6	300.5	92	9.4	210	12	27	2.3
1	1.21	22	1	6	9	4.4	131	40.1	292	90.5	29.6	327	42.3	13.2	6	66.5	2.3	26	0.5	5.2	0.2	1.9	0	0.3	24.4	9.8	16.1	0.3	5.2	4.5	139.7	105.1	2.6	0.7	1.4	4.5	27.7	0.2	23.7	233	0.8	10.9	298	133	8.2	249	15	25	1.7
1	1.35	25	2	6	6.5	5.6	148	45.4	457	81.3	26.6	327	37.7	13.2	3.1	46.9	2.9	44.6	0.3	4.5	0.2	3.6	0	0.3	23.3	9.6	15.8	0.4	5.1	4.9	140.3	104.8	2.6	1	1.5	4.3	44	0.1	20.2	271	0.8	15.3	299.8	165	27.7	277	31	30	1
1	1.31	23	2	6	11.3	4.9	135	40.3	550	82.1	27.4	334	35.9	12.4	3.9	34.4	5.6	49.9	0.5	4.1	1.2	10.5	0.1	1	8.5	7.4	15.1	0.4	4.3	4.6	139.2	103.1	2.7	1	1.6	5.2	26.8	0.2	19.3	278	0.8	16.8	297.2	84	15.3	231	10	31	3.1
1	1.2	32	2	6	5.3	4.6	130	39.3	312	85.1	28.1	330	39.3	13.1	1.9	35.8	3	56.2	0.3	6.2	0.1	1.6	0	0.2	15.4	8.5	15.6	0.3	4.6	4	141.3	106.9	2.5	0.9	1.4	5.2	36.7	0.1	20.5	333	1	13.9	300.4	98	17.1	228	22	31	1.4
1	1.1	23	1	6	6.2	5	140	41.9	272	83.4	27.9	334	37.8	13	0.9	14.9	4.4	71	0.3	4.8	0.6	9.1	0	0.2	15.5	8.2	15.9	0.2	4.8	4.4	140.8	106.4	2.4	1	1.5	4.7	32.7	0.1	20.9	275	1	13.5	300	151	15.9	348	25	41	1.6
1	1.3	23	1	6	5.7	4.8	134	41.8	247	86.4	27.7	321	37.7	12.4	2.2	39	2.8	49.2	0.3	5.2	0.3	5.4	0.1	1.1	19.4	9	16	0.2	4.3	4.3	141.3	104.2	2.5	1	1.9	4.6	33.2	0.1	21.4	182	0.8	15.7	300.1	84	14.7	245	11	18	1.6
1	1.3	25	1	6	6	4.5	122	38.1	387	85.6	27.3	319	39.8	13.2	3.5	58.3	1.8	29.4	0.5	7.9	0.2	3.7	0	0.3	30.5	10.6	15.9	0.4	5.3	3.9	142	107	2.4	0.9	2	4.8	32.1	0.2	21.8	283	1	13.2	301.9	114	13.4	256	12	23	1.9
1	1.4	37	1	6	8.3	5.4	148	44.8	324	82.7	27.3	330	36.9	12.6	3	36.3	4.6	54.9	0.3	3.7	0.4	4.4	0.1	0.6	15.1	8.3	15.7	0.3	5.1	4.3	141	106.2	2.6	1.1	1.7	5.5	36	0.2	19.3	356	0.9	15.5	301	102	21.9	257	12	32	2.7
1	1.3	32	1	7	7.7	5.2	145	43.8	352	83.7	27.8	332	38.2	13.1	4	52.3	2.6	33.9	0.4	5.2	0.6	7.4	0.1	1.1	9.3	7.3	15.3	0.3	5	4.4	141	106.4	2.6	1	1.7	4.2	34	0.1	21	303	0.9	13.6	299.9	103	20.7	269	35	30	0.9
1	1.2	24	2	7	7	4.6	127	38.3	251	84.1	27.8	331	37.8	12.8	3.5	49.6	3	42.5	0.3	4.5	0.2	2.8	0	0.4	16.2	8.6	15.6	0.2	4.6	3.6	138.9	104	2.5	0.9	1.5	4.4	38.3	0.1	24.8	228	0.9	10.1	294	121	18.1	209	10	30	3
1	1.3	28	1	7	7.9	4.8	134	40.3	260	83.3	27.6	331	39.2	13.4	4.2	52.6	3.2	40	0.3	4.3	0.2	2.7	0	0.4	33.6	10.9	16.3	0.3	4.8	4.5	140.9	105	2.6	1.1	1.5	4.4	33.7	0.1	19.4	324	0.9	16.5	299.9	115	8.9	235	9	23	2.6
1	1.2	22	2	7	7.4	4.6	127	39	363	85.2	27.7	325	38.7	12.8	2.7	36.2	3.4	45.8	0.4	4.8	0.9	12.2	0.1	1	13.9	8.3	15.4	0.3	4.5	4.3	139.6	105.6	2.6	0.8	1.6	3.6	37.7	0.1	21.9	219	1.2	12.1	295.8	166	12.3	263	21	36	1.7
1	1.2	42	2	7	7.2	4.7	128	40	330	85.5	27.4	321	39.2	13	2.3	32.4	4.3	59.8	0.4	5.3	0.1	1.9	0	0.4	13.9	8.3	15.6	0.3	4.3	4.4	137.9	105.3	2.6	1	1.9	7.7	25.6	0.3	21.4	226	0.9	11.2	296.6	184	19.1	247	10	32	3.2
1	1.29	23	1	7	7.9	4.5	122	37.9	359	84.5	27.2	322	36.6	12.3	3	38.6	4.2	53.5	0.4	5.3	0.2	2	0	0.4	10.2	7.5	15.5	0.3	5.6	4.1	141.7	106	2.6	0.7	1.6	5.9	26.8	0.2	24.7	300	0.9	11	303.2	137	18.1	204	12	32	2.7
1	1.3	25	1	7	6.9	4.6	136	41	302	88.6	29.4	332	39.9	12.9	2.3	33.5	3.8	55.5	0.6	8.4	0.1	2	0	0.6	13.6	8.1	15.5	0.2	5	4.3	137.8	104.9	2.7	0.8	1.6	4.1	45.5	0.1	22.3	251	0.9	10.6	293.3	114	22.5	185	11	29	2.6
1	1.25	19	1	7	8	5.2	142	42.7	268	81.9	27.3	333	37.3	13.1	4.1	50.6	2.8	35.2	0.7	8.6	0.4	4.9	0.1	0.6	20.2	9.2	15.9	0.3	4.1	4.5	141.5	104.3	2.6	1	1.6	5.4	31.7	0.2	22.3	372	1.1	14.9	301.5	132	14.4	263	12	28	2.3
1	1.25	23	2	7	5.8	4.8	139	42.2	330	87.8	28.9	329	37.8	12.2	1.7	29.8	3.5	59.6	0.3	5.1	0.3	4.3	0.1	1.2	19.9	9.1	15.9	0.3	4.9	4.2	138.6	103.9	2.6	0.9	1.8	5.5	41.3	0.1	20.3	279	1.1	14.4	296.1	134	20.1	246	17	31	1.8
1	1.3	28	1	7	9.6	5	131	40.8	514	81.8	26.2	320	37.7	13.1	3.5	36.5	3.9	40.1	0.8	8.2	1.4	14.2	0.1	0.9	26.2	10	15.7	0.5	4.4	4.1	141.2	103.7	2.6	0.9	1.9	4.2	36.5	0.1	20.8	242	0.9	16.7	299.1	133	22.2	284	24	32	1.3
1	1.26	21	2	7	7.8	4.6	129	38.2	286	83	28.1	338	42.1	14.3	2.4	31	4.2	53	0.4	5	0.8	9.7	0.1	1.2	18.4	8.7	16	0.3	5.5	4.1	139.3	102.8	2.5	0.9	1.6	3.6	31.2	0.1	24.6	213	0.7	11.9	295.9	86	15.8	187	15	30	2
1	1.25	22	1	7	4.9	4.5	128	39	281	86.7	28.4	328	37.7	12.5	1.8	36.1	2.4	49.6	0.3	5.4	0.4	8.3	0	0.6	15.7	8.6	15.6	0.2	4.5	4.1	138.9	104.7	2.4	1	1.7	4.6	31.8	0.1	21.8	284	0.9	12.4	295	135	21.2	225	15	22	1.5
1	1.35	28.2	2	8	9.5	5	139	42.6	360	85.7	28	327	39.2	13.1	5.3	55.5	3.2	33.2	0.7	7.8	0.3	3	0	0.4	25.8	10	16	0.4	6	4	139.4	104.9	2.7	0.9	1.6	4.9	35.1	0.1	21.9	317	0.9	12.6	297.6	129	25.1	252	19	26	1.4
1	1.3	26	1	8	5.7	4.6	126	38.1	213	82.5	27.2	329	36.3	12.5	2.3	40	2.9	51.4	0.3	4.9	0.2	3.4	0	0.3	25.2	9.8	16.2	0.2	5.2	3.8	140.5	103	2.7	1	1.5	7.1	42.4	0.2	25.2	269	0.9	12.3	300.9	96	7.1	205	13	27	2.1
1	1.35	29	1	8	6.7	4.3	116	36.9	307	85.5	26.9	315	36.5	12.1	3.5	52.6	2.5	36.5	0.5	7.1	0.2	3.5	0	0.3	20.8	9.5	15.8	0.3	5	4	141.2	101.3	2.5	0.9	1.4	5.5	43.8	0.1	26.7	350	0.7	13.2	300.9	197	20.2	215	11	30	2.7
1	1.3	28	1	8	5.1	4.6	132	41.5	377	90	28.6	318	37.9	11.9	1.9	38	1.7	33.8	0.3	5.3	1.1	21.8	0.1	1	13.4	8.3	15.4	0.3	4.9	4.2	137.5	104.4	2.5	0.9	1.7	2.8	38.2	0.1	21.6	275	0.8	11.5	291.1	156	23.4	243	15	31	2.1
1	1.35	25	2	8	7.9	4.9	141	41.5	396	85.1	28.8	339	36.7	12.4	4.4	55.5	2.9	36.2	0.4	5.1	0.2	2.9	0	0.3	15.7	8.6	15.4	0.3	4.7	4.3	138.7	106.8	2.4	0.9	1.8	2.3	39.6	0.1	21.7	338	1.1	10.2	293	93	25.5	259	8	21	2.6
1	1.2	27	2	8	6.6	4.8	136	40.7	350	84.8	28.3	334	38.9	13	3.6	53.8	2.6	38.5	0.3	5.2	0.1	1.8	0	0.6	12.7	7.9	15.4	0.3	4.4	4.6	142.8	103.6	2.5	1.1	1.9	4.8	51.8	0.1	25.3	352	1.1	13.9	304	81	16.6	246	12	25	2.1
1	1.25	34	1	8	9.5	5.3	139	43.2	352	82.3	26.5	322	39.6	13.7	3	31.8	4.7	49.5	0.3	3.3	1.4	14.7	0.1	0.6	22.5	9.5	15.8	0.3	5.3	4.2	141.7	105.3	2.5	0.9	1.5	3.9	45.2	0.1	19.1	262	0.8	17.3	301.1	161	18.4	245	18	28	1.6
1	1.31	25	2	8	6.3	4.6	127	39	322	85.5	27.9	326	36.1	12	2.3	37	3.4	54.3	0.4	5.7	0.2	2.6	0	0.4	22.1	9.5	16	0.3	4.1	4.6	140	104.1	2.5	0.9	1.5	5.2	33.1	0.2	18.6	267	1	17.3	298.5	121	22.8	275	17	29	1.7
1	1.29	25	2	8	7.7	5	135	41.4	255	82.4	27	327	39.5	13.6	3.7	48.3	3	39.1	0.5	6.5	0.4	5.7	0	0.3	15.1	8.4	15.6	0.2	4.8	4.1	140.7	105.3	2.6	0.9	1.8	3.6	38.9	0.1	19.7	303	0.8	15.7	298	145	26.9	250	12	28	2.3
1	1.3	30	1	8	5.6	5	135	41.1	305	82.4	27.1	328	36.5	12.6	2.7	47.3	2.4	42.3	0.3	4.9	0.3	4.9	0	0.6	22.5	9.3	16	0.3	5.2	4.2	141	107.4	2.6	0.9	1.6	4.4	35.6	0.1	20.3	248	0.7	13.3	300.1	109	23.7	226	20	27	1.4
1	1.3	26	2	8	15.6	4.9	137	40.3	427	82.3	28	340	36	12.6	13.2	85	2	12.6	0.4	2.2	0	0.1	0	0	19	8.9	16	0.4	4.6	4.2	132.3	97.7	2.7	1	1.3	6.6	38.4	0.2	19.8	499	0.5	12.6	297.9	93	10.6	339	15	25	1.7
1	1.29	37	1	8	9.1	4.5	133	40.9	351	91.1	29.7	326	41.3	12.8	4	43.6	3.7	40.5	0.6	6.9	0.7	8.1	0.1	0.8	31.2	10.9	16.4	0.4	6.2	3.7	144.6	104.4	2.5	0.8	2	3.9	40.3	0.1	25.4	252	0.9	14.8	306.8	116	7.6	215	13	27	2.1
1	1.28	37	2	8	4.7	5	141	42.5	261	85.3	28.3	332	40.5	13.5	1.9	39.6	2.4	50.3	0.3	5.7	0.2	3.7	0	0.6	14.7	8.4	15.6	0.2	5.7	4	141.4	107.7	2.5	0.9	1.6	5.4	44.9	0.1	19.7	269	0.9	14	301.8	97	16.7	223	12	27	2.3
1	1.3	25	1	8	6.7	4.6	130	40.1	232	87.8	28.5	324	39.6	12.8	1.9	28.6	3.5	52.3	0.3	5.1	0.9	13.2	0	0.6	24.6	10.1	16	0.2	4.4	4.4	139.5	107.2	2.6	0.9	1.8	6.5	35.8	0.2	21.8	280	0.7	10.5	298.6	115	18	198	10	27	2.7
1	1.31	33	1	9	6.9	4.5	126	38.9	302	86.7	28.2	325	43.8	14.5	2.9	41.5	2.8	40.7	0.4	5.8	0.8	11.6	0	0.4	17.7	8.8	15.4	0.3	5	4.7	137.8	105.1	2.6	0.9	1.7	5.3	25.4	0.2	23.8	265	0.8	8.9	295.2	109	18.9	229	11	21	1.9
1	1.34	30	1	9	6.5	5.5	142	43.7	263	79.5	25.8	325	36.6	13.2	1.9	28.6	4.1	62.7	0.4	6.6	0.1	1.4	0	0.6	16.7	8.5	15.5	0.2	4.3	4.2	139.1	104	2.4	0.8	1.7	4.1	37.9	0.1	26.6	249	1.1	8.5	294.9	53	15.2	176	11	20	1.8
1	1.4	35	1	9	13.2	4.6	130	39.1	351	84.9	28.2	332	38.4	13	9.1	68.7	2.9	22	0.8	5.6	0.4	3.3	0.1	0.3	14.4	8.4	15.5	0.3	5.3	4.5	142.4	106.4	2.5	0.9	1.5	4.8	37.4	0.1	22.7	233	0.8	13.3	303.8	86	6.6	202	15	25	1.7
1	1.4	31	1	9	10	5	135	42.4	337	84.4	26.8	318	39.4	13.3	5.4	54.2	3.1	30.7	0.4	3.5	1.1	11.3	0	0.3	17.6	8.7	15.8	0.3	4.8	4.6	137.9	103.7	2.5	1	1.9	5	36.8	0.1	22.5	268	0.9	11.7	294.7	167	26.7	246	32	43	1.3
1	1.39	28	2	9	7.4	4.8	139	41.3	261	86.8	29.2	336	37.6	12.4	2.9	39.6	3.7	49.9	0.4	6	0.3	3.6	0.1	0.7	23.7	9.7	16.1	0.3	5	3.7	139	102.4	2.6	0.8	1.5	5.8	49	0.1	20	263	1	16.6	296.2	118	30.9	243	24	31	1.3
1	1.39	42	1	9	8.2	5.4	139	42.7	315	79	25.8	327	36.8	13.3	2.9	35.3	4	49.4	0.4	4.9	0.8	9.7	0.1	0.6	12.3	7.8	15.3	0.3	5	4.1	140.4	105.2	2.6	1	1.6	5.5	36.9	0.2	20.3	307	0.9	14.9	299.5	128	8	244	18	24	1.3
1	1.35	32	2	9	6.1	4.8	123	39	340	81.7	25.7	315	41.5	14.4	2.9	47.2	2.4	39.1	0.3	5.5	0.5	7.6	0	0.5	16.8	8.5	15.6	0.3	4.9	4.4	140.9	103	2.7	0.9	1.6	4.2	33	0.1	24	224	0.8	13.9	299.6	279	16.5	222	9	30	3.3
1	1.39	30	2	9	11.4	3.8	108	33.7	498	87.7	28	319	42.3	13.5	7.5	65.6	2.9	25	0.6	5.5	0.4	3.7	0	0.2	14.4	8.2	15.8	0.4	4.4	3.9	137.7	103.9	2.4	0.8	1.7	2.9	38.9	0.1	22.8	200	0.7	11	290.5	66	15.1	188	7	18	2.6
1	1.3	33	2	9	6.4	4.6	126	39.8	331	87	27.5	316	40.3	13.2	3.1	47.8	2.6	41.2	0.4	6.5	0.2	3.7	0.1	0.8	19.7	9.1	15.8	0.3	5.2	3.9	137.2	106.1	2.4	0.9	1.9	3.1	35.5	0.1	20.7	235	1	10.4	290.6	83	23.4	242	24	32	1.3
1	1.42	36	1	9	7.7	4.8	128	40.3	205	84.9	26.9	316	39.9	13.3	3.3	42.7	3	39.2	0.3	4.2	1	13.3	0	0.5	14.7	8.6	15.1	0.2	4.6	4.2	138.9	103.8	2.7	0.9	1.8	6.4	42	0.2	21.7	368	1.1	13.4	297.2	109	15.8	265	17	26	1.5
1	1.41	31	1	9	7.6	4.7	133	41.9	437	88.6	28.2	318	43.5	14	4.2	55.5	2.8	37.3	0.4	4.8	0.2	2.1	0	0.2	12.6	7.9	15.3	0.4	5.3	4.9	141.3	104.3	2.5	0.8	1.7	4.3	40.1	0.1	23.9	311	0.9	13.1	302.1	94	11.4	195	19	25	1.3
1	1.45	37	1	10	4.8	5	134	39.9	283	80.6	27.1	336	38	13.5	2.5	51.5	1.9	38.3	0.4	7.3	0.1	2.3	0	0.4	22.8	9.4	15.9	0.3	5.2	4.5	141.1	107.3	2.3	0.8	1.6	4.1	46.7	0.1	22.1	252	1.1	11.7	300.4	100.6	17.5	227.5	25	26	1
1	1.42	42	2	10	6.4	5.1	138	43.3	275	85	27.2	320	39.9	13.5	2.3	35.8	3.6	56.7	0.4	5.6	0.1	1.5	0	0.3	19.3	9	15.6	0.3	4.7	4.2	141.1	104.2	2.4	0.9	1.4	2.7	33.9	0.1	22.7	385	0.9	14.2	298.2	86	22.1	195	17	22	1.3
1	1.41	38	2	10	5.6	4.2	123	37.9	315	89.3	29	325	38.8	12.3	2.5	44.6	2.5	44.2	0.4	6.5	0.3	4.4	0	0.2	12.4	8.1	15.3	0.3	5.2	4	138.9	104.8	2.6	0.8	1.9	5.2	34	0.2	19.5	228	0.8	14.6	296.1	95	26	212	17	23	1.4
1	1.41	32	2	10	8.7	5.1	141	43.4	320	85	27.6	324	41.7	13.9	5.2	59.8	2.5	29.1	0.4	4.3	0.6	6.5	0	0.2	17.2	8.7	15.7	0.3	4.4	4.4	135.7	102	2.6	0.9	1.9	4.1	44.4	0.1	25	231	0.9	8.7	288.7	77	18.2	222	5	26	5.2
1	1.38	33	1	10	6.1	4.4	125	38.7	342	87.2	28.1	323	39.3	12.8	3.1	51	2.2	35.9	0.4	5.7	0.4	6.5	0.1	0.9	15	8.4	15.5	0.3	4.5	4.5	142	104.3	2.5	0.7	1.7	4.9	48.6	0.1	26.7	389	0.9	11	302.4	77	8	222	11	26	2.4
1	1.45	38	1	11	7.1	5.2	147	44.1	298	85.7	28.6	333	40.4	13.6	4	56	2.5	35.6	0.3	4.6	0.2	3.4	0	0.3	13.6	8.2	15.4	0.2	5	4.1	140.5	105.9	2.5	0.9	1.8	2.4	36.8	0.1	23.8	341	0.9	10.8	296.5	91	16	197	10	22	2.2
1	1.45	29	1	11	6.9	4.7	131	39.9	404	85.5	28.1	329	38.2	12.8	3.5	50.7	2.7	39.8	0.4	6.1	0.2	2.2	0	0.5	23.1	9.5	16.1	0.4	4.5	4	136.6	98.5	2.5	1	1.8	4.1	53	0.1	22.8	363	1.1	15.3	289.8	419	6.2	228	19	23	1.2
1	1.52	33	1	11	7	4.2	118	36.6	275	87.3	28.3	324	38.9	12.7	2.9	41.7	3.4	48.7	0.3	4.7	0.3	4.5	0	0.3	23.9	9.7	16	0.3	5.2	4.4	142.1	107.1	2.5	0.9	1.9	9.1	32.9	0.3	18.1	228	0.8	16.9	307.3	123	13.3	254	18	19	1.1
1	1.51	39	1	11	6.3	4.4	130	38.6	212	87.4	29.3	335	37.3	12.2	2.9	45.9	2.4	38.7	0.4	6.5	0.5	7.9	0.1	0.8	26.5	10.1	16.1	0.2	5.4	3.8	141.4	105.4	2.4	0.8	1.6	5.2	39.7	0.1	22.4	346	0.9	13.6	300.9	102	13.6	185	15	29	1.9
1	1.46	29	1	11	5.6	4.4	138	42.9	319	97.3	31.3	322	39.9	11.6	3	53.5	2.1	38.1	0.3	4.6	0.2	3.2	0	0.5	22.1	9.5	16.2	0.3	4.9	4.5	142.2	104.5	2.7	0.9	1.8	3.8	41.6	0.1	22.5	251	0.8	15.2	302.1	87	17.4	159	22	24	1.1
1	1.48	40	1	11	9.2	4.8	130	39.9	412	83.6	27.2	326	42	14.4	5	53.7	3	32.5	0.4	4.7	0.8	8.4	0	0.5	13.2	8.1	15.5	0.3	4.7	4.5	140.8	104.5	2.5	0.9	1.7	5.4	44.3	0.1	20.1	365	0.9	16.2	300.6	118	14.3	248	17	19	1.1
1	1.52	34	2	11	8.4	4.3	128	37.9	355	87.8	29.5	337	41.8	13.5	4.6	54.8	2.9	34.2	0.7	7.7	0.3	2.9	0	0.3	18.1	8.8	16	0.3	4.9	4.2	140.4	104.2	2.4	0.8	1.5	4.1	32.6	0.1	26.3	192	0.8	9.9	298.1	60	4.6	170	8	19	2.4
1	1.51	37	2	11	8.6	5	140	44.9	224	90.6	28.3	312	43.2	13.5	4.2	48.5	3.4	39.7	0.4	5.1	0.5	6.3	0	0.3	25.5	9.8	16.3	0.2	5.4	4.1	138.7	106.9	2.5	0.8	1.6	4.5	52.2	0.1	20.7	376	0.8	11.1	295.3	95	22.1	200	30	23	0.8
1	1.55	46	1	11	11.5	5	134	42.3	302	84.3	26.7	317	41.3	13.9	5.5	47.5	4.5	38.7	0.7	6.2	0.8	7.2	0	0.2	24	9.6	16	0.3	5.3	4.5	139.5	105.2	2.7	0.9	2	5.4	45.9	0.1	15.9	351	1	18.4	298.7	135	29.7	216	27	28	1
1	1.59	48	2	12	7.6	4.7	131	40.6	375	86.1	27.8	323	38.7	12.7	3.4	45.6	3.3	44.3	0.5	7.1	0.2	2.3	0	0.5	24.6	9.9	16	0.4	7.9	4	142.6	106	2.5	0.8	1.7	3.9	35.4	0.1	19.2	354	0.9	17.4	305.1	81	16.5	172	22	20	0.9
1	1.41	30	2	12	5.8	4.7	133	40.7	191	86.5	28.4	328	40.3	13.2	2.4	41	3	50.5	0.3	5.4	0.1	2.3	0	0.7	35.7	11.4	16.6	0.2	5.5	3.8	139.7	105	2.5	0.9	1.7	5.4	52.7	0.1	19.5	315	0.8	15.2	297.9	107	15.9	176	8	18	2.3
1	1.42	37	1	12	6.9	4.6	134	41.3	277	90.2	29.3	325	37.6	11.8	3.4	49.6	2.5	36.5	0.7	9.8	0.3	3.7	0	0.3	18	8.8	15.9	0.2	4.9	3.9	138.6	106.1	2.3	0.9	1.9	4.4	54.7	0.1	20.3	450	1.2	12.2	294.4	100.6	17.5	227.5	12	19	1.6
1	1.54	46	1	12	6	5.6	155	48.1	253	86.4	27.9	323	40.2	13.3	3	50.3	2.3	38.8	0.4	6.5	0.3	4.1	0	0.3	16.7	8.5	15.8	0.2	5.3	4.1	142.7	104	2.6	0.7	1.8	4.4	47.5	0.1	26.9	512	1.2	11.8	303.6	220	13.1	207	14	24	1.7
1	1.59	42	2	13	6.3	4.9	141	42.4	286	86.8	29	334	39	12.7	3.7	59.1	2.1	34.1	0.3	4.2	0.1	2.2	0	0.3	26.7	10.1	16.2	0.3	5.3	4	141.3	106.9	2.4	0.9	1.4	3.4	30.2	0.1	21.5	377	0.6	12.9	299.3	51	3.9	125	12	22	1.8
1	1.56	63	1	13	7.8	5	149	46.6	222	92.8	29.6	319	49.8	15.2	3.2	41.2	3.3	42.2	0.6	7.2	0.7	8.8	0	0.5	16.2	8.5	15.6	0.2	4.6	4.2	142	104.6	2.5	0.7	1.7	3.9	60.5	0.1	24.3	482	1.4	13.1	300.8	113	8.5	219	12	21	1.8
1	1.59	49	2	13	10.8	4.5	129	40.4	420	89	28.3	318	39.1	12.5	6	55.7	3.6	33.5	0.7	6.3	0.4	3.9	0.1	0.5	13.3	8.1	15.7	0.3	4.6	3.7	141.7	103.2	2.6	1.1	1.3	3.1	50.4	0.1	20.9	282	0.8	17.6	298.4	98	10.2	216	8	14	1.8
1	1.49	37	2	13	7.7	4.5	124	38.7	259	86	27.5	320	38.8	12.7	4.8	62.6	2.1	27.3	0.5	6.3	0.3	3.4	0	0.2	25.1	9.9	16.3	0.3	4.9	4	143	106.5	2.4	0.7	1.5	4.1	36.5	0.1	24.7	234	0.9	11.8	303	105	1.6	175	17	16	0.9
1	1.69	60	1	14	6.1	5.4	139	43.2	301	80.4	25.9	322	37.9	13.4	2.8	46.1	2.7	44.1	0.3	4.3	0.3	4.7	0	0.6	16.9	8.6	15.6	0.3	4.9	4.4	141.3	103.9	2.6	0.7	1.6	5	56.7	0.1	24.3	503	1.1	13.1	301.3	216	9.4	187	12	25	2.1
1	1.63	48	1	14	7.4	5.3	150	46.7	388	87.4	28	320	38.6	12.7	3.3	44.7	3.5	47.7	0.4	5.4	0.1	1.6	0	0.4	24.5	9.7	16.3	0.4	9.3	4.8	138.7	100.6	2.6	0.9	1.3	4.8	38.9	0.1	21.6	484	0.9	16.5	301.2	318	19.2	208	129	54	0.4
1	1.7	60	1	14	7.8	5.1	141	43.1	314	84.4	27.5	326	39.8	13.4	4	52	3	38.8	0.4	5.6	0.2	2.7	0.1	0.8	21.1	9.3	15.9	0.3	5.3	4.3	144	105.3	2.5	1	2.1	4.8	59.4	0.1	24.7	383	1.2	14	306.8	122	7.3	216	14	19	1.4
1	1.68	38	2	14	5.9	4.4	137	42.9	285	98.1	31.2	318	43.1	12.4	2.4	40.2	2.7	46.6	0.3	4.6	0.5	7.7	0.1	0.8	18	8.9	16.1	0.3	4.8	4.4	140.8	101.9	2.6	0.8	1.3	2.8	42.3	0.1	23.7	260	0.6	15.2	298.2	69	7.7	178	35	28	0.8
1	1.62	45	2	15	8	4.5	134	40	255	89.1	29.7	334	40.2	12.8	4.1	51.7	3.3	40.6	0.5	5.8	0.1	1.4	0	0.4	19.5	8.9	16.1	0.2	4.9	4.5	140.4	103.9	2.4	0.9	1.7	6.4	54.8	0.1	21.7	332	0.8	14.8	301	45	10	155	7	12	1.7
1	1.63	55	1	15	6.4	4.9	141	42.5	229	86.9	28.8	332	41	13.3	2.6	40.6	3.2	50.6	0.3	5.2	0.2	3	0	0.5	17.6	8.8	15.6	0.2	4	3.6	142.1	104.2	2.4	0.7	1.7	6.7	61.1	0.1	25.6	359	0.9	12.3	302	130	4.8	159	11	19	1.7
1	1.55	40	2	15	6.5	4.3	115	35.5	266	81.7	26.4	323	36.5	12.7	3.1	47.9	2.9	44.3	0.3	4.5	0.2	3	0	0.2	22.5	9.5	16	0.3	4.3	4	139.1	107	2.5	0.9	1.3	4.4	43	0.1	19.5	350	0.9	12.6	294.8	71	13	171	8	17	2.1
1	1.65	52	2	16	7.4	4.5	126	39.5	268	87.2	27.8	319	41.9	13.6	3.7	49.6	3.2	42.7	0.4	5.6	0.1	1.7	0	0.3	24.5	9.7	15.9	0.3	4.4	4	142	105.7	2.4	0.9	1.5	5.3	53.5	0.1	20	313	0.7	16.3	301.6	93	9.3	180	7	15	2.1
1	1.75	58	1	16	7.5	4.6	142	42.7	300	93	30.9	333	39.2	11.9	4.4	58.5	1.9	26	0.6	8.6	0.5	6.3	0	0.5	38.9	11.8	16.1	0.4	4.8	4	142	106.2	2.6	0.9	2.1	6.7	75.9	0.1	21.9	392	1	13.9	303.4	108	13.9	188	26	22	0.9
1	1.45	37	1	17	6	5.6	167	50.4	254	89.4	29.6	331	40.2	12.9	2.8	47.2	2.4	39.6	0.5	7.7	0.3	5	0	0.4	28.8	10.4	16.2	0.3	4.5	4.6	141.7	103.1	2.7	0.9	1.3	4.8	73.3	0.1	28.6	585	1.1	10	301.9	100	8.3	193	21	21	1
1	1.8	75	1	18	8.8	5.1	147	44.9	248	88	28.8	327	28.9	12.7	4.6	51.9	3.3	37.3	0.5	5.8	0.4	4.3	0	0.4	22.8	9.5	16.4	0.2	4.9	3.9	141.3	104.3	2.5	0.8	1.3	3.6	76	0.1	22.8	531	1.1	14.2	298.9	143	4.1	132	19	17	0.9
[truncated: 27 more columns]

## Sheet: Silent carrier  group
Nationa	Heiht/m	Weight/kg	Gender	Age	WBC	RBC	HGB	HCT	PLT	MCV	MCH	MCHC	RWDSD	RWDCV	NEcount	NEratio	LYMcountA	LYMratio	MONcount	MONratio	Eocount	EOratio	Bacount	BAratio	PLCR	MPV	PDW	PCT	GLU	K	Na	Cl	Ca	Mg	P	BUN	CREA	BUNNCR	CO2	UA	CYSC	AG	Osmoe	CK	CKMB	LDH	ALT	AST	AST/ALT
1	0.7	7.5	1	1	7.2	5.4	114.8	36.7	339.5	69.1	21.7	312.3	42.4	17.8	3.7	49.8	2.9	39.6	0.4	6.1	0.3	4	0	0.4	26.1	9.4	15.3	0.3	4.6	4.4	139.7	104.4	3	0.9	1.6	4.7	42.4	0.1	21.9	296.3	0.9	12.6	297.9	100.6	17.5	227.5	18	27.3	1.51667
1	1	12.3	2	2	7.3	5.3	133	41.4	314	78.8	25.3	321	34.4	12.4	2.1	28.3	4.5	62.1	0.4	5.7	0.3	3.6	0	0.3	10.8	7.5	15.5	0.2	4.4	5.1	141.1	108.5	2.5	0.7	1.6	4.3	20.7	0.2	21.8	243	1	10.8	301.1	148	17.6	327	16	36	2.25
1	1	15.2	1	3	6.1	4.4	108	34.1	410	76.9	24.3	317	36	13.3	1.4	23.4	3.9	63.4	0.4	6.9	0.4	5.9	0	0.4	9.5	7.4	15.1	0.3	4.4	4	137.7	104.7	2.4	0.9	1.4	6.5	33.5	0.2	19.5	259	0.9	13.5	294.3	93	16.6	250	8	35	4.375
1	1.12	15.6	2	3	5.5	5.3	85	28	318	52.9	16.1	304	46.2	24.3	2.3	43	2.5	46	0.5	8.2	0.1	2.4	0	0.3	18.4	8.4	14.5	0.3	5.1	4	140.5	104.3	2.6	1	1.6	5	26.9	0.2	24.9	222	1	11.3	299	90	22.2	217	12	37	3.08333
1	1.15	20	1	5	5.1	5.4	132	41.4	387	76.9	24.6	320	37.7	13.9	2.2	42.4	2.5	48.9	0.3	5.8	0.1	2.2	0	0.7	16.4	8.4	15.9	0.3	5.7	4.2	139.1	106.1	2.6	1	1.5	6.3	34.8	0.2	21	211	0.9	12	298.7	184	23.7	206	14	31	2.21429
1	1.15	21.5	1	5	10.3	5.3	131	40.6	394	76.7	24.7	322	36.3	13.5	5.6	54.7	3.8	37.2	0.6	6	0.2	1.8	0	0.2	13.7	8	15.5	0.3	4.7	4.7	141.4	105.5	2.4	1	1.7	7.5	51.4	0.2	22.9	273	0.8	13	304.4	100.6	17.5	227.5	20	33	1.65
1	1.28	21.1	1	6	12.1	4.8	120	37.1	338	77.3	25	324	38.4	14.2	6.2	51.1	3.8	31.6	0.5	4.2	1.5	12.8	0	0.2	25.8	10	15.4	0.3	4.4	4.2	138.1	102	2.5	0.9	1.6	5.2	38.7	0.1	22.9	181	0.8	13.2	294.2	81	18	234	12	29	2.41667
1	1.2	21.4	1	6	6.1	5.4	120	38.5	295	71.7	22.3	311	39.8	15.9	2.5	40.3	2.6	43	0.4	5.8	0.6	9.7	0.1	1.2	16.9	8.1	15.8	0.2	5.4	4.4	140.6	104.5	2.5	1	1.5	4.5	41.4	0.1	24.7	210	0.9	11.4	300	123	13.8	185	11	29	2.63636
1	1.32	23.1	2	7	6.5	4.5	118	37.8	316	84.4	26.5	314	35.6	12	2.3	34.5	3.3	49.8	0.4	6.1	0.6	8.9	0.1	0.7	24.5	9.8	15.7	0.3	3.9	4.6	137.8	101	2.5	0.9	1.5	4.5	30.2	0.2	23.5	265	0.9	13.3	293.1	77	23.5	252	14	33	2.35714
1	1.4	23.5	2	7	9.7	4.9	126	39.6	347	81.2	25.9	319	41.8	14.8	5.9	60.7	2.9	29.4	0.7	7.2	0.2	2.4	0	0.2	18.7	8.9	15.6	0.3	4.6	4.1	138.6	100.1	2.5	0.9	1.5	2.5	29.5	0.1	12.3	140	0.5	26.2	297.9	124	48.5	509	37	50	1.35135
1	1.45	28.3	2	10	7.6	4.6	122	37.6	311	81.6	26.5	325	35.1	12.2	4.8	63.2	1.8	23.1	0.9	11.9	0.1	1.2	0	0.5	24.1	9.7	16.2	0.3	5.1	4.1	142	105.1	2.4	0.9	1.7	6.7	47.2	0.1	23.7	225	1	13.2	304.1	70	15	228	9	21	2.33333
1	1.48	29.4	2	10	7.1	5	133	40.7	289	82	26.8	326	41.3	14.3	4.2	59	2.1	29.8	0.5	7.6	0.2	3.2	0	0.3	22.5	9.4	15.9	0.3	5.1	3.9	140.7	104.6	2.6	0.9	1.6	4.5	51.2	0.1	21.6	280	1.1	14.5	298.8	144	15	223	21	30	1.42857
1	1.47	27.5	2	10	6.8	5.2	136	42.1	331	82.1	26.2	323	36.7	12.9	4	58.1	2.3	33.6	0.5	6.6	0.1	1.4	0	0.2	18	8.8	15.6	0.3	5.4	4.3	139.1	105.2	2.2	0.8	1.7	4.4	44.2	0.1	20.8	372	0.9	13.1	297.1	100.6	17.5	227.5	12	23	1.91667
3	1.43	27.5	1	10	5.2	5	129	39.2	355	78.9	26.1	330	39.4	13.4	2.5	48.5	1.9	36.9	0.4	7.5	0.4	7	0	0.1	29.2	10.5	15.7	0.4	4.8	4.5	137	100	2.3	0.9	1.8	3.7	43	0.1	25.1	349	0.9	12.6	297.9	83	21	233	51	45	0.882353
1	1.51	30.2	2	11	7.8	5	134	41.9	263	83	26.5	319	38.6	13.2	4.7	59.5	2.5	31.6	0.5	5.8	0.2	2.7	0	0.3	21.5	9.2	16	0.2	4.3	4.3	141.3	105.7	2.4	0.7	1.4	3.3	34.9	0.1	22.7	332	0.9	12.9	298.7	840	15.2	294	14	34	2.42857
1	1.46	32.5	1	12	6.1	4.9	132	40.7	302	82.6	26.9	326	38	13.2	2.7	44.5	2.6	41.9	0.3	5.3	0.5	7.6	0	0.6	22.9	9.5	16.2	0.3	5.3	4.4	137.5	102.2	2.5	0.9	1.9	5.6	40.8	0.1	21.1	251	0.8	14.2	294.8	95	18.5	244	17	26	1.52941
1	1.41	33.1	2	12	7.1	5.2	134	41.4	330	80.5	25.9	322	39	13.8	3.3	45.9	3.3	46.5	0.4	5.3	0.1	1.6	0	0.6	20.2	9.2	15.4	0.3	3.9	4	139.4	104.4	2.5	0.9	2	6	39.5	0.2	21.6	205	0.8	13.4	296.7	52	16.9	186	20	18	0.9
1	1.47	40.2	1	13	8.7	5.1	132	42	461	81.7	25.7	315	39.3	13.7	6	68.8	2.3	26.2	0.3	3.8	0.1	0.5	0	0.4	19.5	9	15.8	0.4	4.3	5.2	138.6	102.7	2.5	1.1	1.7	7.2	54	0.1	24.6	296	0.9	11.3	299.1	53	17.3	244	28	27	0.964286
3	1.42	41.2	2	15	6.3	4.9	134	40.6	271	83	27.3	329	40.3	13.5	3.1	48.8	2.4	37.3	0.3	4.2	0.5	8.2	0.1	1.1	20.8	9.2	15.9	0.3	4.8	4.4	139.4	104.8	2.5	1	1.4	4.9	51.7	0.1	25.6	329	0.8	9	297.4	87	7.4	147	9	15	1.66667
1	1.43	37	1	15	7.2	5.4	114.8	36.7	339.5	69.1	21.7	312.3	42.4	17.8	3.7	49.8	2.9	39.6	0.4	6.1	0.3	4	0	0.4	26.1	9.4	15.3	0.3	4.6	4.4	139.7	104.4	3	0.9	1.6	4.7	42.4	0.1	21.9	296.3	0.9	12.6	297.9	100.6	17.5	227.5	18	27.3	1.51667
1	1.59	52	1	16	6.3	5.2	139	44.2	250	84.4	26.5	314	38.5	13	2.8	44.3	2.9	45.2	0.4	6.5	0.2	3.7	0	0.2	35.6	11.3	16.3	0.3	5.1	3.9	141.9	106.2	2.3	0.9	1.5	7	62.9	0.1	22.6	391	0.8	13.1	303.6	62	10.8	198	10	18	1.8
[truncated: 27 more columns]

## Sheet: Mild group
Nationa	Heiht/m	Weight/kg	Gender	Age	WBC	RBC	HGB	HCT	PLT	MCV	MCH	MCHC	RWDSD	RWDCV	NEcount	NEratio	LYMcountA	LYMratio	MONcount	MONratio	Eocount	EOratio	Bacount	BAratio	PLCR	MPV	PDW	PCT	GLU	K	Na	Cl	Ca	Mg	P	BUN	CREA	BUNNCR	CO2	UA	CYSC	AG	Osmoe	CK	CKMB	LDH	ALT	AST	AST/ALT
1	0.8	8.5	1	1	10.3	5.6	109	33.9	387	60.7	19.6	322	34.8	15.8	3.2	30.9	6.3	61.2	0.7	6.4	0.1	1.2	0	0.3	23.9	9.3	15.1	0.4	6.1	4.2	139.8	107	2.8	0.9	1.5	4.5	15.6	0.3	22.4	212	1	10.4	298.6	152	31.1	321	17	49	2.9
1	0.9	9.8	2	2	17.2	6.1	125	39.8	401	65.8	20.7	315	38.2	16.7	6	34.6	10.2	59.4	0.7	4.3	0.3	1.5	0	0.1	14.7	7.9	15.1	0.3	4.5	5.4	141.1	106.3	2.5	0.9	1.6	2.7	15.7	0.2	21.4	156	0.8	13.4	300.2	86	27.8	290	14	38	2.7
1	0.9	15.2	2	3	7	5.4	105	36.7	380	61.8	19.5	316	42.4	17.8	3.7	49.8	2.9	39.6	0.4	6.1	0.3	4	0	0.4	26.1	9.4	15.3	0.3	4.6	4.4	139.7	104.4	3	0.9	1.6	4.7	42.4	0.1	21.9	296.3	0.9	12.6	297.9	100.6	17.5	227.5	18	27.3	2.1
1	1	15	1	3	6.6	4.8	115	36.6	534	76	23.9	315	51	18	2.7	40.7	3.3	50.6	0.4	5.4	0.2	3	0	0.3	36.6	11.3	16	0.6	4.6	4.4	139.7	104.4	3	0.9	1.6	4.7	42.4	0.1	21.9	296.3	0.9	12.6	297.9	100.6	17.5	227.5	18	27.3	2.1
1	1.05	15.3	2	4	6.7	5.4	100	32	235	59.3	18.6	313	34.3	16.6	3.1	45.9	2.8	42.2	0.5	7.8	0.2	3.6	0	0.4	14.2	7.7	14.8	0.2	4.5	4.1	141.3	105.6	2.5	0.9	1.6	3.7	27.8	0.1	23.9	262	1	11.8	299	90	12.1	237	11	27	2.5
1	1.1	16	1	5	6.6	5.6	108	34.5	336	62.1	19.4	313	35.9	16.3	2.8	42.6	2.4	36.9	0.4	6.3	0.9	13.2	0.1	0.8	24.4	9.1	14.6	0.3	4.4	4.7	141.7	106.8	2.5	1.1	1.7	7	39	0.2	22.9	246	1.1	12	304.2	55	11.4	207	14	27	1.9
1	1	16.3	1	5	6.7	5.7	113	36.7	361	63	20	317	42.4	17.8	3.7	49.8	2.9	39.6	0.4	6.1	0.3	4	0	0.4	26.1	9.4	15.3	0.3	4.6	4.4	139.7	104.4	3	0.9	1.6	4.7	42.4	0.1	21.9	296.3	0.9	12.6	297.9	100.6	17.5	227.5	18	27.3	2.1
1	1.08	15.8	2	5	8.4	5.7	116	36	447	62.7	20.1	321	33.6	15.4	3.2	38.4	4.2	49.6	0.6	7.1	0.4	4.2	0.1	0.6	20.4	8.4	15.4	0.4	5	4.5	141.6	106.9	2.6	1	1.8	4.2	27.9	0.2	23.6	279	0.7	11.1	301.3	100.6	17.5	227.5	19	26	1.4
1	1.1	16.1	2	5	8.4	5.7	116	36	447	62.7	20.1	321	33.6	15.4	3.2	38.4	4.2	49.6	0.6	7.1	0.4	4.2	0.1	0.6	20.4	8.4	15.4	0.4	5	4.5	141.6	106.9	2.6	1	1.8	4.2	27.9	0.2	23.6	279	0.7	11.1	301.3	100.6	17.5	227.5	19	26	1.4
3	1.18	18.3	2	5	5.7	5.5	119	39.5	508	71.2	21.4	301	42.1	16	2	34.7	2.7	48.1	0.3	6	0.6	11	0	0.2	17.9	8.7	15.5	0.4	3.3	4.8	138	101	2.5	1	1.8	3.4	33	0.1	21	358	0.9	12.6	297.9	134	32	282	13	27	2.1
1	1.2	20	1	6	7.3	6	118	37.4	387	62.6	19.8	316	34.8	15.8	2.9	39.3	3.7	49.9	0.4	5.5	0.3	4.6	0	0.5	18.4	8	15.6	0.3	4.5	4.6	140	106.8	2.6	1	1.9	4.3	35.1	0.1	18.8	286	0.9	14.4	298	112	30.1	215	14	28	2
1	1.18	21	2	6	5.4	5.2	106	35.7	237	68.8	20.5	298	37.3	15.5	3.4	63.3	1.3	24.4	0.6	10.5	0.1	1.3	0	0.5	23.2	9.1	15.4	0.2	6	4.1	142.3	102	2.6	0.9	1.5	2.5	36.6	0.1	22.5	219	0.5	17.8	301.3	48	9.3	219	14	30	2.1
1	1.12	16	2	6	10.8	5.3	104	33.1	504	62.7	19.8	315	34.6	15.9	7.1	65.9	2.9	27.1	0.5	4.8	0.2	1.9	0	0.2	21.5	8.8	15.5	0.5	4.7	4.3	138.3	104.6	2.5	0.9	1.7	5.2	26.8	0.2	22.3	248	0.6	11.4	295	100.6	17.5	227.5	11	25	2.3
1	1.13	20	2	6	8.1	5.8	114	36.1	291	62.6	19.8	316	32.8	15	3.2	39.5	3.3	40.8	0.3	3.8	1.3	15.5	0	0.3	35.6	10.3	15.5	0.3	4.7	4.1	140.6	105.9	2.4	0.9	1.6	3.4	36.2	0.1	19.8	258	1	14.9	297.6	153	19.2	276	13	31	2.4
1	1.12	18.6	1	6	6.7	5.7	116	36.9	420	64.8	20.4	314	34.3	15.1	2.5	37.9	3	44.2	0.5	6.9	0.7	10.1	0.1	0.9	15.8	7.8	15.4	0.3	5.4	4.8	140.2	104.9	2.3	0.7	1.7	4.5	19.2	0.2	24.2	246	0.8	11.1	300	128	23.6	247	17	27	1.6
1	1.21	21	1	6	5	6	119	37.8	413	62.6	19.7	315	36.4	16.6	2.1	42.6	2.3	45.2	0.5	9.1	0.1	2.7	0	0.3	22.2	8.7	15.4	0.4	5.1	4.4	140.7	105.2	2.4	0.9	1.4	3.4	35.2	0.1	23	203	0.8	12.5	298.7	127	29.3	253	15	40	2.7
1	1.22	20	1	6	7.2	5.8	116	37.8	399	65.4	20.1	307	36.7	16	2.9	40.9	3.3	45.8	0.6	8.8	0.3	3.8	0	0.6	18.1	8.5	15.5	0.3	4.6	3.9	141.6	103.6	2.4	0.8	1.6	3	31.7	0.1	24.9	237	0.9	13.1	298.7	171	26.7	201	13	34	2.6
1	1.28	37	2	6	9.6	5	105	33.9	331	67.3	20.9	311	35.2	14.5	3.9	40.3	4.5	47	0.5	5	0.7	7.1	0.1	0.5	19.1	8.3	14.7	0.3	5.1	4	139.5	102.5	2.4	0.9	1.8	6.2	53.9	0.1	24.9	243	0.8	12.1	398.2	16	17.5	227.5	16	29	1.8
3	1.25	17	2	6	7.8	5.3	116	35.9	301	68.4	22.1	323	34	13.8	2.2	28.5	4.7	60.2	0.5	5.8	0.4	4.8	0.1	0.7	18.8	8.7	15.7	0.3	4.2	4.9	142.4	106.5	2.6	0.9	1.9	4.2	29	0.1	26	297	0.8	9.9	303	137	24.6	213	12	25	2.1
3	1.2	18	2	7	8.1	5.6	103	32.8	259	59	18.6	314	33.4	15.5	3.4	41.5	4	49.5	0.5	5.7	0.2	2.9	0	0.4	26.3	9.2	14.9	0.3	4.8	4.6	142.6	107	2.5	1	1.7	4.6	32.3	0.1	24	229	0.7	11.6	303.8	69	19.4	228	13	28	2.2
3	1.3	25.3	2	7	6	5.8	119	38	331	65.5	20.5	313	35.1	14.4	3.1	51.9	2.3	38.7	0.4	7.2	0.1	2	0	0.2	38.1	11.2	16.1	0.4	4.6	4.8	139	101	2.5	1	1.9	2.8	37	0.1	14.6	251	0.9	12.6	297.9	95	21	221	11	28	2.1
3	1.41	26.4	2	8	6.2	6.1	116	36.2	252	59.5	19	319	34.3	16.4	2.2	35.7	3.4	54.4	0.4	7.1	0.1	2.3	0	0.5	26.2	9	15.1	0.3	4.7	4.2	140.9	104.7	2.3	0.8	1.6	5	27.1	0.2	23.8	290	0.9	12.4	299.9	76	18.9	214	14	27	1.9
1	1.42	27.8	2	8	6.4	5.4	107	34.6	403	63.7	19.7	310	34	15.2	2.3	36.2	3.4	52.6	0.5	7	0.2	3.5	0	0.7	14.9	7.6	15.6	0.3	4.4	4.7	137.5	104.7	2.5	1	1.9	6.2	41.4	0.2	19.2	292	0.9	13.6	295	111	19	234	22	34	1.6
1	1.45	27.6	2	8	5.9	5.9	117	37.7	414	64.5	20.1	312	36.1	16	1.5	26	3.5	59.3	0.4	6.2	0.5	7.7	0.1	0.8	21.6	9	15.5	0.4	4.8	4.5	141.7	108.4	2.2	0.9	1.7	3.5	34.6	0.1	20.6	230	0.6	12.7	300.8	100.6	17.5	227.5	10	23	2.3
1	1.22	25.6	1	8	4.9	5.8	103	32.6	228	56	17.8	317	57.4	28.3	1.8	37.1	2.5	51.2	0.3	6.6	0.3	5.1	0	0	28.5	9.5	13.9	0.2	4.6	4.4	139.7	104.4	3	0.9	1.6	4.7	42.4	0.1	21.9	296.3	0.9	12.6	297.9	100.6	17.5	227.5	18	27.3	2.1
1	1.35	25	2	8	3.8	5.5	116	36.9	363	67.8	21.2	313	36.1	14.4	1.5	39.1	2.1	54.4	0.2	4.6	0.1	1.8	0	0.1	29.5	10.3	15.5	0.4	4.8	5.2	139	104	2.5	0.9	1.6	2.9	42	0.1	20.4	245	0.9	12.6	297.9	79	27	210	12	25	2.1
1	1.41	26.2	2	9	6.2	5.2	104	33.2	268	64.4	20.2	314	35.6	15.7	2.2	36.5	3.3	53.5	0.3	4.2	0.3	4.4	0.1	1.4	25.3	9	15.8	0.2	4.8	4.2	141.4	104.1	2.5	1.1	1.6	4.7	28	0.2	24.8	245	0.6	12.5	300.7	155	3.9	242	14	27	1.9
1	1.41	26.5	1	9	6	5.7	114	37.9	297	66.5	20.1	302	36.9	15.8	2.7	44	2.8	45.5	0.4	6.2	0.2	3.9	0	0.3	38.9	11.2	15.8	0.3	5	4.2	139.3	105.3	2.5	1	1.6	3.4	45.7	0.1	20.6	301	0.9	13.4	295.3	135	25.8	241	10	28	2.8
1	1.35	22	2	9	10.7	6.1	116	36.9	353	60.5	19.1	315	34	16	8	74.5	2	18.3	0.6	6	0.1	0.6	0	0.4	29.4	9.3	15.9	0.3	5.1	4.4	138.7	104.5	2.6	1	1.7	4.1	41	0.1	20.6	241	0.8	13.6	295.5	120	13.4	263	9	21	2.3
1	1.41	25.2	2	9	10.7	5.3	83	27.1	388	51.2	15.6	306	36.3	20.5	6.9	64.2	2.9	27.2	0.8	7	0.1	1.3	0	0.2	32	9.5	14.9	0.6	4.4	4.1	138.8	106.3	2.4	0.9	1.6	3.4	24.8	0.1	20.9	226	0.7	11.6	293.5	100.6	17.5	227.5	10	21	2.1
1	1.32	23.6	1	9	4.3	5.4	126	39.9	369	74.1	23.5	317	38.3	14	1.6	37.6	2.2	51.7	0.3	6.4	0.2	4	0	0.3	22.7	9.5	15.6	0.4	3.3	4.7	138	104	2.4	1	1.7	5.7	40	0.1	18.7	290	0.9	12.6	297.9	153	26	247	11	22	2.1
1	1.4	29	1	10	6.4	5.8	118	38.5	353	66.4	20.3	306	37.4	16	2.5	38.9	3.2	50.1	0.5	7	0.2	3.4	0	0.6	32.5	10.2	16	0.4	5.5	4.2	141	103.4	2.4	1.1	1.7	3.6	38.9	0.1	24.7	343	1	12.9	299.1	172	17.8	197	13	25	1.9
1	1.47	28.5	2	10	12.8	6.1	115	37.7	328	62.1	19	305	37.2	17.2	8.7	68.1	2.9	23	0.8	5.9	0.3	2.4	0.1	0.5	21.1	8.9	15.1	0.3	4.8	4.2	140.9	104.8	2.3	0.9	1.7	5.6	41.5	0.1	19.2	422	1	16.9	300.6	69	10.9	263	17	17	1
1	1.41	28.6	1	11	8.7	5.9	116	37.3	343	63.7	19.7	310	36.2	16.2	3.9	45.1	3.7	42.4	0.5	5.8	0.5	6.3	0	0.3	17.6	8.1	15.4	0.3	4.8	4.3	137.7	102.8	2.6	0.9	1.8	5.1	45.1	0.1	24.7	378	1.1	10.2	293.9	338	21.3	266	20	29	1.5
1	1.42	28.4	2	11	7.2	5.4	114.8	36.7	339.5	69.1	21.7	312.3	42.4	17.8	3.7	49.8	2.9	39.6	0.4	6.1	0.3	4	0	0.4	26.1	9.4	15.3	0.3	4.6	4.4	139.7	104.4	3	0.9	1.6	4.7	42.4	0.1	21.9	296.3	0.9	12.6	297.9	100.6	17.5	227.5	18	27.3	2.1
3	1.41	28.3	2	11	6.3	5.6	125	40.7	271	73	22.5	308	36.4	14.2	2.8	44.6	2.5	40.4	0.4	5.5	0.6	9	0	0.5	16.5	8.3	15.6	0.2	5.3	4	140	102.7	2.3	0.9	1.5	4.5	50.4	0.1	24.1	248	1.1	13.2	297.8	127	17.3	242	28	36	1.3
1	1.42	28.6	1	11	8.2	6.1	120	38.5	414	62.9	19.6	313	35.4	16.1	3.9	47.5	3.1	38.2	0.8	9.9	0.3	3.9	0	0.4	21.3	8.7	15.2	0.4	5.6	4.7	140.2	102.4	2.4	0.9	1.6	6.4	64.2	0.1	25.3	380	0.9	12.6	297.9	100.6	17.5	227.5	18	19	1.1
3	1.6	30.6	1	11	6.8	6.3	133	41.6	351	66.1	21.1	319	35.3	14.4	3.4	50.8	2.6	38.1	0.5	7.2	0.2	3.6	0	0.3	33.8	10.4	15.8	0.4	4.3	5.1	138	103	2.6	0.9	1.8	4.2	57	0.1	23.8	301	0.9	12.6	297.9	106	32	219	11	21	2.1
1	1.55	35.2	2	12	4	5.2	128	41.3	284	78.9	24.5	310	38.1	13.1	2	50.9	1.6	40.4	0.2	5.5	0.1	3	0	0.2	24.2	9.7	15.6	0.3	3.2	4.1	140	103	2.4	1	1.8	2.9	46	0.1	20.4	344	0.9	12.6	297.9	100	20	231	6	17	2.1
3	1.61	34.2	2	13	4.7	5.8	124	39.8	232	69.3	21.5	311	39.6	16.2	2.4	50.1	1.8	38.1	0.3	6.5	0.2	4.7	0	0.5	29.7	9.7	15.3	0.2	5	4.1	141.3	104.7	2.3	0.7	1.4	6	50.1	0.1	26	229	0.9	10.6	301.8	77	13.1	174	11	23	2.1
1	1.62	37	2	15	7.2	5.4	114.8	36.7	339.5	69.1	21.7	312.3	42.4	17.8	3.7	49.8	2.9	39.6	0.4	6.1	0.3	4	0	0.4	26.1	9.4	15.3	0.3	4.6	4.4	139.7	104.4	3	0.9	1.6	4.7	42.4	0.1	21.9	296.3	0.9	12.6	297.9	100.6	17.5	227.5	18	27.3	2.1
[truncated: 27 more columns]

## Sheet: Hb H group
Nationa	Heiht/m	Weight/kg	Gender	Age	WBC	RBC	HGB	HCT	PLT	MCV	MCH	MCHC	RWDSD	RWDCV	NEcount	NEratio	LYMcountA	LYMratio	MONcount	MONratio	Eocount	EOratio	Bacount	BAratio	PLCR	MPV	PDW	PCT	GLU	K	Na	Cl	Ca	Mg	P	BUN	CREA	BUNNCR	CO2	UA	CYSC	AG	Osmoe	CK	CKMB	LDH	ALT	AST	AST/ALT
3	1	13.4	1	3	7.4	6.4	98	32.2	607	50.4	15.3	304	40.9	22.2	3.5	47.4	3.1	41.1	0.6	7.6	0.3	3.7	0	0.2	28.3	9.2	15	0.6	2.2	4.8	136	101	2.5	0.9	1.8	5.8	36	0.1	18.7	209	0.9	12.6	297.9	93	31	290	14	30	2.1
3	0.9	12	2	3	11	6.6	99	33.5	662	51	15	295	38.1	20.4	5	45.5	3.7	34.1	0.9	7.9	1.4	12.5	0	0	23.7	8.9	15	0.6	1.9	4.4	139.7	104.4	3	1.3	3.9	3.8	25	0.1	12.9	273	0.9	12.6	297.9	65	45	363	6	31	2.1
3	0.9	13.1	2	3	7.8	6.4	119	37.3	350	58.3	18.7	320	40	18.5	3.6	46.9	3.4	44.3	0.4	5	0.3	3.5	0	0.3	0.4	10.5	15.2	0.4	3.5	5	137	102	2.6	0.8	2	2.9	20	0.1	21	253	0.9	12.6	297.9	92	33	319	15	32	2.1
1	1.1	16.8	1	4	11.9	6.4	98	30.3	449	47.1	15.3	324	32	19.1	7	58.7	3.9	32.4	0.9	7.2	0.2	1.4	0	0.3	22.7	8.8	14.5	0.5	4.2	4.6	139.7	104.9	2.5	0.9	1.7	5.5	30.2	0.2	22.6	123	1.2	12.2	298.4	148	37.7	381	14	45	3.2
1	1	15	2	4	6.6	5.9	123	40.3	336	67.9	20.7	305	62.5	26.1	3.4	52.2	2.3	34.8	0.5	7.1	0.4	5.6	0	0.3	24.4	8.8	15.3	0.3	4.6	4.4	139.7	104.4	3	0.9	1.6	6.6	42.4	0.1	30	271	1.2	12.6	297.9	90	22	253	14	29	2.1
3	1	15	2	4	10.2	5.9	93	30.2	522	51	15.7	307	39.8	21.3	5.7	55.5	3.8	37.2	6.5	6.4	0.1	0.8	0	0.1	28.1	9.3	14.9	0.5	3.5	5.1	140	104	2.4	1	2	3.3	28	0.1	13	255	0.9	12.6	297.9	85	24	252	11	26	2.1
3	1	14	2	4	10.7	6.3	100	33.2	652	53	16	302	44.3	22.7	6.9	64.4	2.7	25	0.8	7	0.3	3.2	0	0.4	38.1	10.4	15.4	0.7	2.6	5.6	137	100	2.5	0.9	1.7	6	23	0.1	18	304	0.9	12.6	297.9	59	23	238	14	28	2.1
3	1.1	15	2	4	6.6	5.3	83	27	417	51.4	15.7	306	43	22.6	3.6	53.9	2.2	33.4	0.5	7.4	0.3	5	0	0.3	30.8	9.6	14.6	0.4	3.8	5.2	139	103	2.4	1	1.7	4.7	33	0.1	22.3	179	0.9	12.6	297.9	72	23	246	10	27	2.1
3	1.2	16	1	4	8.1	5.7	98	31.3	461	55	17.2	313	44	21.7	3.7	45.2	3	37.1	0.7	8.1	0.7	9.2	0	0.4	28.4	9.5	14.9	0.4	3.5	5.1	137	102	2.3	1	2	5	29	0.1	20.7	243	0.9	12.6	297.9	95	27	245	12	27	2.1
1	1	16	2	5	7.2	5.2	88	28.7	371	55.7	17	305	36	18.6	3	42.3	3.6	49.8	0.4	5.7	0.1	1.6	0	0.6	29.5	9.1	15.5	0.5	4.6	4	140.3	105.2	2.4	0.8	1.7	5.3	20.6	0.3	23.7	246	0.9	11.4	298.8	92	9.8	251	22	31	1.4
1	1.1	16	1	5	6.2	5.5	97	32.8	304	60.2	17.8	297	40.2	18.7	3.5	56.2	2.1	33	0.4	7	0.2	3	0.1	0.8	25.6	9.2	15.3	0.3	4.2	4.5	139.1	105.2	2.7	1.1	1.7	4.3	11	0.4	24.3	208	0.7	9.6	295.7	147	20.6	250	14	39	2.8
1	1.1	17.2	2	5	9	5.1	96	30.4	269	59.4	18.8	317	34.9	16.2	4.1	45.4	4.2	46.3	0.4	3.9	0.4	4	0	0.4	27.8	9.5	15	0.3	4.1	3.9	140.4	104.7	2.5	0.9	1.6	4.5	32.8	0.1	22.6	284	0.9	13.1	297.2	87	23.6	246	11	31	2.8
1	1.15	16.5	2	5	6.9	5.6	98	31	337	55.1	17.5	318	47.1	24	3.4	49.3	2.8	39.9	0.6	8.5	0.1	1.2	0.1	0.9	36.4	10.2	14.8	0.5	4.6	4.6	139.7	105.5	2.7	1.1	1.5	5	12.8	0.4	26	324	0.8	8.2	298.2	88	15.9	241	12	32	2.7
1	1.1	15	1	5	9.9	5.7	94	28.6	332	50	16.4	328	43.9	24.9	4.7	47	4.2	42	0.8	8.1	0.2	2.1	0.1	0.7	28.9	9.3	14.6	0.5	4.5	4.1	137.8	105.6	2.6	1	1.8	5.2	15.6	0.3	22.7	201	0.7	9.5	293.3	105	25.1	286	14	38	2.7
1	1.1	20.1	1	5	8.7	5.6	93	28.9	271	51.7	16.7	323	54.1	29.3	5.7	65.3	2.1	24.6	0.6	7.1	0.2	2.7	0	0.3	33.2	9.8	14.2	0.7	4.4	4.2	139.5	108.1	2.5	0.8	1.8	4.8	26.8	0.2	18	411	0.8	13.4	296.6	81	18	283	18	33	1.8
1	1.1	17	2	5	8.1	5.6	94	31.9	419	57.1	16.9	296	40.5	20.4	2.8	34.8	4.6	56.9	0.4	5.3	0.2	2.3	0.1	0.6	34.4	9.6	16	0.6	4.3	4.2	141.5	103.3	2.4	0.7	1.4	5.3	25.2	0.2	22.2	316	0.9	16	300.9	73	15.1	255	11	31	2.8
3	1.2	15.2	2	5	13	6.2	101	31.6	412	51.2	16.4	321	37.3	21.3	8.8	67.5	3.1	23.7	0.6	4.7	0.5	3.7	0	0.3	22.7	8.4	15	0.5	5.2	4.5	139	106.2	2.4	1.1	1.7	4	35.1	0.1	19.3	436	1	13.5	296.3	199	15.7	267	16	30	1.9
3	1.1	15.6	2	5	4.4	5.4	91	30.4	342	56.8	17	299	37.9	19.4	1.9	42.9	2	46.2	0.3	6.7	0.1	3.3	0	0.9	16.8	8.1	14.9	0.3	4	4.3	138.8	105.9	2.4	1	1.5	4.1	34.7	0.1	21.9	214	0.9	11	294.3	77	11	240	2	32	16
1	1.16	15.8	1	5	12.4	5.9	98	32.6	450	55.6	16.6	299	40.1	20.7	5.4	43.5	5	40.2	1.1	8.6	0.9	7.2	0.1	0.4	18.1	8.1	14.7	0.4	5.3	4.2	140.8	105.1	2.4	1	1.5	6.6	32.4	0.2	19.4	311	0.9	16.3	301.8	65	15.4	209	10	24	2.4
3	0.9	13	1	5	9.5	5.5	91	28.8	384	52.4	16.5	315	35.5	19.7	4.4	46.2	3.7	38.8	0.8	8.3	0.6	6.3	0	0.4	23.3	8.4	15.2	0.4	4.9	4.8	141.5	107.1	2.4	0.8	1.7	3.9	23.9	0.2	24.4	237	1	10	301.3	144	11.4	272	12	30	2.5
1	1	17.3	2	5	7.2	5.4	114.8	36.7	339.5	69.1	21.7	312.3	42.4	17.8	3.7	49.8	2.9	39.6	0.4	6.1	0.3	4	0	0.4	26.1	9.4	15.3	0.3	4.6	4.4	139.7	104.4	3	0.9	1.6	5.3	28	0.1	28	284	0.8	12.6	297.9	118	25	248	16	29	1.8
1	1	11.1	1	5	5.6	5.5	90	29.9	485	54.8	16.5	301	49.1	24.4	2.4	42.5	2.7	47	0.3	5.9	0.3	4.5	0	0.1	42.6	10.8	14.9	0.5	2.4	4.9	139	104	2.3	0.9	1.7	3.6	32	0.1	17.5	438	0.9	12.6	297.9	77	44	261	18	34	2.1
1	1	17	1	5	6.6	6.2	92	30.8	469	49.7	15	301	38.5	21	3	45.6	2.7	41.2	0.3	5.2	0.5	7.2	0.1	0.8	33.5	9.8	14.8	0.5	3.7	5.7	137	103	2.3	0.9	2	4.3	38	0.1	19.4	347	0.9	12.6	297.9	118	32	304	18	35	2.1
1	1.1	17	2	5	13.5	5.4	88	28.8	583	53.1	16.2	305	45	23.1	11.8	87.2	1.2	9.1	0.4	2.8	0.1	0.7	0	0.2	33.1	10	15	0.6	4.6	4.4	139.7	104.4	3	0.9	1.6	4.7	42.4	0.1	21.9	296.3	0.9	12.6	297.9	100.6	17.5	227.5	18	27.3	2.1
3	1.2	20	1	5	9.8	6.3	99	31.7	710	50	15.7	313	40.9	22.3	3.2	32.3	5.3	53.5	1	9.8	0.4	3.9	0.1	0.5	35.8	10.2	14.9	0.7	4.9	5.5	144	105	2.5	1	2	4.7	36	0.1	18.2	224	0.9	12.6	297.9	72	21	248	15	31	2.1
1	1.1	16	2	5	7.7	5.4	89	29.5	536	54.3	16.4	301	40	19.9	5.1	65.8	2.1	27.9	0.3	4	0.1	1.8	0	0.5	40.4	11	15.4	0.6	4.1	4.7	140	105	2.4	0.9	1.6	5	28	0.1	18.9	238	0.9	12.6	297.9	67	23	256	10	23	2.1
1	1.1	15	1	5	6.2	4.3	69	26.5	471	61.9	16.2	262	68.5	30.4	2.1	33	3.6	58.1	0.4	5.7	0.2	3.1	0	0.1	27	9.2	15.4	0.4	4	4.9	139	104	2.6	0.8	1.4	3.6	23	0.1	22.5	303	0.9	12.6	297.9	72	19	288	11	28	2.1
1	1.1	17	2	5	4.8	3.9	95	29.7	88	76.3	24.5	322	64.3	22.4	2.9	60.8	1.5	31.6	0.2	4.4	0.1	2.3	0	0.7	29.2	9.3	14.6	0.1	3.8	3.9	140.5	106.7	2.4	1	1.2	4.3	38.2	0.1	21.3	128	0.7	12.5	297	109	10.2	371	36	58	1.6
3	1	18.2	2	5	4.7	4.9	88	32.4	465	66.8	18.2	272	65.8	27.1	2.8	59.2	1.6	34.7	0.2	4.2	0.1	1.7	0	0.2	29.5	9.7	15.4	0.5	2.5	4.8	136	100	2.5	1.1	1.9	4.1	36	0.1	18.5	285	0.9	12.6	297.9	77	17	345	21	37	2.1
1	1.1	16.5	2	6	9	4.8	83	25.6	296	53.9	17.4	323	53.8	27.6	5.8	64.9	2.6	29.3	0.3	3.7	0.2	1.8	0	0.3	29.3	9.2	14.6	0.4	6.6	4	140.6	105.8	2.3	1	1.4	6.8	27.1	0.3	23.4	208	0.8	11.4	302.5	88	19.4	289	16	31	1.9
1	1.2	21.6	1	6	4.6	5.2	87	27.6	207	53	16.7	314	39.2	20.7	1.2	24.8	2.6	56.9	0.3	6.3	0.5	11	0	0.8	25.3	9.1	14.5	0.2	4.6	4.2	140.5	105.2	2.2	1	1.4	3	31	0.1	24.1	180	0.7	11.2	297	128	21.3	235	9	26	2.9
1	1.2	20.2	1	6	9.2	6.1	103	32.7	303	53.6	16.9	315	43.2	22.6	5.4	58.6	3	32.8	0.6	6.3	0.2	1.8	0.1	0.5	30.8	9.4	14.8	0.4	4.6	4.7	140.6	104.7	2.6	1	1.9	4.9	33.2	0.2	24.2	295	0.9	11.7	300.2	72	18.4	282	16	30	1.9
1	1.2	15.5	2	6	6.8	5.4	97	31.1	348	57.7	17.9	311	44.9	21.5	2.8	41.2	2.9	43.6	0.5	7.8	0.4	6.5	0.1	0.9	19.3	8.2	14.9	0.3	4.2	4.1	142.1	105.2	2.5	0.9	1.6	3.1	27.4	0.1	26.1	260	0.8	10.8	299.6	73	20.5	266	13	30	2.3
3	1.1	20.6	1	6	6.6	5.2	83	26.2	401	50.7	16.1	317	38.6	21	3.5	53.5	2.3	34.6	0.5	8	0.2	2.9	0.1	0.9	32.7	9.7	14.8	0.6	4.4	4.2	139.5	103.1	2.5	1	1.4	2.6	30.9	0.1	25.6	205	0.8	10.8	294.4	86	20	210	15	34	2.3
3	1.2	21.2	1	6	9.1	6.2	95	31.4	602	50.8	15.3	302	37.7	21.5	3.5	38.1	3.3	36.6	0.5	6	1.7	18.5	0.1	0.7	18.4	8	15.1	0.6	4.5	4.6	140.8	104.2	2.4	0.8	1.8	5	34.4	0.1	24.4	306	1	12.2	300.3	119	13.5	251	1	28	28
1	1.4	15	2	6	7	6.5	104	32.9	389	50.4	15.9	316	35.2	20.4	3.4	49.1	2.8	39.9	0.5	7.8	0.2	3	0	0.2	26.6	9.1	14.5	0.5	4.7	4.3	138.5	103.1	2.5	0.9	1.6	2.4	52.9	0	19.3	326	1.1	16.1	292.6	221	49.9	249	19	35	1.8
1	1.2	20	1	6	5.6	6.5	105	33.5	309	51.9	16.3	314	38.7	21.8	1.7	30.4	2.9	52	0.3	5.5	0.6	11.3	0	0.8	23.2	8.6	14.7	0.4	4.4	4.7	136.4	103.5	2.6	1	1.7	5.2	36.2	0.1	22.7	293	1	10.2	291.7	72	7	206	10	27	2.7
1	1.3	25	1	6	12.2	6.5	99	31.1	465	47.6	15.1	318	32.3	19.8	6.8	55.5	4.2	34.2	0.6	4.7	0.6	5.1	0.1	0.5	22.9	8.7	14.6	0.6	5.2	4.5	138.3	105.4	2.4	1	1.6	4.5	35.9	0.1	20	313	1	12.9	295.3	79	17.4	205	7	23	3.3
2	1.4	23.2	1	6	7.2	5.4	114.8	36.7	339.5	69.1	21.7	312.3	42.4	17.8	3.7	49.8	2.9	39.6	0.4	6.1	0.3	4	0	0.4	26.1	9.4	15.3	0.3	4.6	4.4	139.7	104.4	3	0.9	1.6	4.7	42.4	0.1	21.9	296.3	0.9	12.6	297.9	100.6	17.5	227.5	18	27.3	2.1
1	1.2	21.6	1	6	6	6	103	33.2	222	55.1	17.2	312	39.5	20.8	2.4	39	2.9	47.5	0.3	5.2	0.5	7.6	0	0.6	23.7	8.7	14.8	0.3	5.1	4.2	141.1	105.1	2.2	0.8	1.6	4.6	26.1	0.2	25.7	238	0.8	10.3	300.3	165	21.2	193	16	29	1.8
1	1.1	17	1	6	7.7	5.8	99	33.5	402	58.3	17.2	295	48.5	22.5	4.2	54.5	2.7	34.8	0.6	7.8	0.2	2.7	0	0.2	35.7	10	14.9	0.4	3.8	5.4	140	102	2.5	0.9	1.7	3.5	27	0.1	22.9	263	0.9	12.6	297.9	74	16	265	11	28	2.1
3	1	17	2	6	6.5	4.6	81	27.6	733	59.9	17.5	291	52.5	24	2.8	43.7	2.9	45	0.6	9.3	0.1	1.5	0	0.5	53	12.9	15.9	0.9	4.2	5.3	139	105	2.3	1	2.2	3.5	24	0.1	17.9	191	0.9	12.6	297.9	72	32	239	13	21	2.1
1	1.2	21.7	2	6	7.3	6.9	103	32.2	451	46.7	14.9	319	33.1	19.3	3.8	51.8	2.6	35.1	0.5	6.5	0.5	6.2	0	0.4	46.9	11	14.2	0.5	4.1	5.4	141	106	2.4	0.9	2	3.8	39	0.1	20.5	320	0.9	12.6	297.9	61	20	213	12	23	2.1
3	1.1	19.5	2	6	6.6	6.4	123	38.9	362	61	19.3	317	35.5	15.6	2.7	40.5	3.3	50.3	0.3	4.9	0.3	4.2	0	0.1	22.1	8.9	15.3	0.3	4.6	4.7	140	104	2.4	0.9	1.8	2.6	35	0.1	21.7	232	0.9	12.6	297.9	169	22	266	11	29	2.1
3	1.1	18	1	6	6.8	5.5	91	29.8	475	54.4	16.5	304	46.4	23.2	3.6	52.6	2.6	39.1	0.5	6.7	0.1	1.5	0	0.1	35.3	10.3	15.2	0.5	4	5.3	138	102	2.4	0.9	1.8	6.6	28	0.1	21.3	128	0.9	12.6	297.9	90	20	247	12	27	2.1
3	1.1	18.7	1	6	6.4	5.1	89	29.6	622	58.1	17.4	300	50.4	23.6	2.5	38.8	2.6	40.2	0.3	5.3	0.9	14.7	0.1	1	39	10.7	15.9	0.7	4.6	5.5	138	104	2.4	0.9	1.9	4.3	28	0.1	22.3	269	0.9	12.6	297.9	98	17	228	11	21	2.1
1	1.1	17	2	6	3.5	3.3	70	23.5	122	70.6	21.2	300	67	26.9	1.7	48.5	1.5	42.5	0.2	5.8	0.1	2.3	0	0.9	27	8.8	15.1	0.2	4.9	4.1	142	110.3	2.5	1	1.4	5.7	34.3	0.2	20.8	137	0.6	10.9	302.9	100.6	17.5	227.5	21	48	2.3
1	1.2	20.8	1	7	7.2	5.9	113	34.3	400	58.4	19.2	329	35.1	16.6	2.7	37.1	3.9	54.7	0.4	5.5	0.2	2.4	0	0.3	13.3	7.7	14.8	0.3	4.7	4.5	139.1	106.9	2.6	1	1.8	6.6	23.3	0.3	23.8	276	0.8	8.4	298.5	154	19.4	245	12	28	2.3
1	1.3	27	1	7	4.9	5.8	96	31.4	258	54.1	16.5	306	42.8	22.1	2.3	45.7	2.3	46.6	0.2	4.8	0.1	2.6	0	0.3	25.3	9.1	14.5	0.3	4.4	4.4	141.1	105.6	2.5	1	1.4	4.5	38	0.1	24.4	233	1	11.1	299.9	158	19.3	246	18	47	2.6
3	1.2	20.6	1	7	5.2	5.6	112	35.1	298	62.1	19.8	318	35	15.5	2.7	51.9	1.9	35.8	0.4	7.5	0.2	3.4	0.1	1.3	15.5	8	15.1	0.2	4.5	4.1	141.3	104.3	2.5	0.9	1.7	4.9	31.1	0.2	25.7	297	0.8	11.3	300.1	172	19.6	247	15	29	1.9
1	1.2	16	2	7	10.6	5.9	103	32.6	382	55.7	17.6	315	43.1	21.5	4.8	45.4	3.2	30.3	0.8	7.2	1.7	15.6	0.1	1.3	17.1	8	14.8	0.3	4.5	4.3	142	105.6	2.5	1	1.7	3.9	27.7	0.1	25.2	282	0.9	11.2	301	54	17.6	267	10	27	2.7
3	1.4	20	1	7	7.6	6.1	96	36.7	433	50.4	15.8	313	42.4	17.8	3.7	49.8	2.9	39.6	0.4	6.1	0.3	4	0	0.4	26.1	9.4	15.3	0.3	4.6	4.4	139.7	104.4	3	0.9	1.6	4.7	42.4	0.1	21.9	296.3	0.9	12.6	297.9	100.6	17.5	227.5	18	27.3	2.1
3	1.1	18	2	7	6.6	5.7	98	31.7	391	56.1	17.3	308	49.9	25.4	2.8	41.9	3.3	49	0.4	6	0.2	2.5	0	0.4	26.7	8.8	15	0.5	5.4	4.4	138.4	105	2.4	0.9	1.3	5.4	32.8	0.2	17.4	246	1	16	296.4	58	11.2	262	27	31	1.2
1	1.1	25.2	2	7	7.2	5.4	114.8	36.7	339.5	69.1	21.7	312.3	42.4	17.8	3.7	49.8	2.9	39.6	0.4	6.1	0.3	4	0	0.4	26.1	9.4	15.3	0.3	4.6	4.4	139.7	104.4	3	0.9	1.6	4.7	42.4	0.1	21.9	296.3	0.9	12.6	297.9	100.6	17.5	227.5	18	27.3	2.1
1	1.4	20	1	7	11.1	5.5	94	33.2	281	60.4	17.2	284	37.7	17.7	8.6	77.8	1.9	16.8	0.4	3.9	0.1	1	0	0.3	23.8	9.1	14.3	0.3	3.1	4.5	140.3	104.2	2.3	0.8	1.4	5.8	31.7	0.2	22	292	0.8	14.1	298.5	101	21.1	245	11	28	2.6
3	1.2	19	1	7	6.9	5.3	84	27.7	340	52.7	15.9	302	44.1	22.6	3.1	45.5	2.9	42.5	0.7	10.8	0.1	1.1	0	0.1	40.6	10.6	14.7	0.4	3.5	5.4	138	103	2.4	1.9	19.1	4.2	33	0.1	19.1	355	0.9	12.6	297.9	69	22	229	18	32	2.1
1	1.2	20.4	2	7	7.3	5.5	95	30.5	523	55.1	17.3	313	61.6	30.4	3.7	50.6	2.7	37.4	0.5	6.8	0.4	4.8	0	0.4	28.6	9.3	14.5	0.5	4.6	4.4	139.7	104.4	3	0.9	1.6	4.7	42.4	0.1	21.9	296.3	0.9	12.6	297.9	100.6	17.5	227.5	18	27.3	2.1
3	1.3	25.6	2	7	5.6	6.6	103	34.8	380	52.8	15.7	297	43.7	22.6	1.7	30.1	3.5	62.4	0.3	4.5	0.2	2.6	0	0.4	25.5	9.1	14.3	0.4	3.6	4.5	138	104	2.4	1	1.7	4	40	0.1	20.1	253	0.9	12.6	297.9	76	20	218	11	20	2.1
3	1.2	20.5	1	7	6.1	6.6	106	35.7	446	54.4	16.2	297	41.2	20.7	3	49.3	2.3	37.2	0.5	8.6	4.5	3	0	0.4	31.9	10	15.2	0.5	3.1	4.7	139	104	2.5	0.8	1.4	3.2	26	0.1	21.3	274	0.9	12.6	297.9	55	23	308	20	29	2.1
1	1.3	24	1	8	6.9	5.9	119	38.6	326	66	20.3	308	36.2	15.7	4.4	63.5	1.6	23.1	0.7	10.7	0.2	2.3	0	0.2	23.1	8.9	15.7	0.3	4	4.3	137.9	103.4	2.5	0.9	1.8	4	34.5	0.1	18.9	358	1	15.6	292.4	78	29.3	320	30	28	0.9
3	1.2	26.3	1	8	6.3	5.6	108	34.4	292	62	19.4	313	36	16	2.6	41.7	3	46.8	0.4	6.2	0.3	4.4	0.1	0.7	19	8.7	15.4	0.3	4.4	3.9	142	104.9	2.6	0.9	1.8	5.6	19.7	0.3	27.7	320	0.8	9.4	301.8	540	24.8	238	13	32	2.5
3	1.3	22	2	8	6.2	6	102	32.8	292	55.2	17.2	312	41.5	21.8	2.2	35.3	3.3	54	0.5	7.5	0.2	2.8	0	0.3	24.7	8.9	14.6	0.4	4.9	4.3	137.4	101.9	2.5	0.9	1.4	5.4	41.2	0.1	24.2	275	0.9	11.3	293.6	70	21.1	159	17	33	1.9
3	1.4	37	2	8	5.2	5.3	97	33.3	347	62.7	18.3	292	43.9	20.1	2.3	43.6	2.5	48.5	0.4	7.1	0	0.3	0	0.5	19.4	8.2	15.1	0.3	4.5	4.4	140	102.4	2.6	0.9	1.1	5	36	0.1	25.2	362	0.8	12.4	298.3	71	26.1	179	17	26	1.5
1	1.3	28	1	8	9.2	6	102	33.1	443	55.6	17.1	308	37.6	19.4	4.6	50	3.3	36.1	0.7	7.1	0.6	6	0.1	0.6	32.2	9.6	15.1	0.6	5.6	5.1	140.4	103.6	2.5	1.1	1.6	3.5	38.7	0.1	23.4	324	1	13.4	300	111	10.9	213	12	25	2.1
1	1.1	24.3	2	8	7.2	5.4	114.8	36.7	339.5	69.1	21.7	312.3	42.4	17.8	3.7	49.8	2.9	39.6	0.4	6.1	0.3	4	0	0.4	26.1	9.4	15.3	0.3	3.4	5.7	141	109.7	2.3	0.8	1.6	2.9	32.3	0.1	19	294	0.9	12.3	299.8	100.6	17.5	371	7	33	4.7
1	1.1	24.8	2	8	7	4.9	96	30.9	257	63.5	19.6	309	56.5	26.2	4	57.3	2.3	33.3	0.4	6	0.2	3	0	0.3	32.6	9.8	15.4	0.3	4.9	4	138.2	105	2.5	0.9	1.8	5.2	40.3	0.1	22.9	254	1.1	10.3	294.6	74	16.4	207	25	289	1.1
3	1.1	25.3	1	8	8.5	5.4	86	28.4	549	53	16	302	45.3	23.2	5.4	63.1	2.3	27.2	0.5	5.6	0.3	3.8	0	0.3	42.8	11	14.9	0.6	4.4	5.1	141	105	2.4	0.9	1.8	2.6	33	0.1	23.7	219	0.9	12.6	297.9	74	39	262	11	30	2.1
1	1.2	20	2	8	7.9	6.3	101	32.3	498	51.4	16	311	44.1	23.6	3.5	44.3	3.4	42.4	0.5	6.3	0.5	6.8	0	0.2	34.3	9.8	14.6	0.5	4.3	4.6	137	104	2.5	0.9	1.7	5.8	39	0.1	22.5	272	0.9	12.6	297.9	84	29	258	13	27	2.1
3	1.3	25	1	8	7.8	6	102	34.5	428	57.2	16.9	296	43.1	20.4	3.5	44.4	3.6	46.9	0.4	5	0.2	2.6	0.1	1.1	38.5	10.7	15	0.5	4.4	5.5	138	102	2.5	0.8	1.6	3.5	37	0.1	19.7	210	0.9	12.6	297.9	131	19	297	11	29	2.1
3	1.2	21	1	8	9.1	6.2	124	39.5	381	64	20	312	34.7	14.6	4.1	44.6	3.5	38.2	0.6	7	0.9	9.9	0	0.3	32.5	10.6	15.8	0.4	4.7	4.5	140	102	2.5	0.9	1.6	4.8	42	0.1	22.8	323	0.9	12.6	297.9	133	21	248	14	39	2.1
3	1.2	19	2	8	6.3	5.8	99	32.5	373	56.1	17	303	46.4	22.6	2.4	38.9	3.1	48.9	0.4	5.9	0.4	6	0	0.3	38.9	10.6	15.2	0.4	4	5	138	103	2.4	0.9	1.7	3.6	37	0.1	20.5	310	0.9	12.6	297.9	74	17	236	9	26	2.1
1	1.4	20	1	8	6.6	6.1	104	35.1	289	57.6	17.1	296	47.3	22.2	4.2	64.1	1.9	29.3	0.3	4.2	0.1	2.1	0	0.3	33.2	9.7	14.6	0.3	3.2	5	139	101	2.4	1	1.8	5	34	0.1	21.8	299	0.9	12.6	297.9	66	20	268	20	28	2.1
1	1.2	23	1	8	4.8	5.9	95	31.1	449	52.4	16	306	50.3	26.1	2.4	48.9	2	42.4	0.3	5.8	0.1	2.6	0	0.3	23.6	8.8	14.6	0.4	4.6	4.8	138	107	2.5	0.9	1.7	4.8	37	0.1	18.8	222	0.9	12.6	297.9	188	14	285	10	35	2.1
3	1.5	26.8	1	9	8.2	6.1	93	31	381	50.6	15.2	302	37	21.2	3.9	48.1	3.1	37.4	0.6	7.8	0.5	5.6	0.1	0.9	25	8.9	14.7	0.4	5.6	4.5	140.6	105.8	2.3	0.9	1.5	4.7	38.4	0.1	23.5	314	0.9	11.3	300.4	134	12.3	224	16	24	1.5
1	1.2	24.5	1	9	7.3	6.3	100	31.2	629	50	15.9	319	35.7	20.1	3.1	42.5	2.9	39.4	0.3	4.4	0.9	12.7	0.1	0.9	14.9	7.8	14.7	0.6	8.6	4	138.4	103.5	2.5	1	1.9	6.1	15.2	0.4	24.3	316	0.8	10.6	299.5	78	16.6	204	13	29	2.2
1	1.5	25.3	1	9	6.3	6.5	102	33.7	437	51.7	15.7	303	32.7	18.2	3.6	57.2	1.8	28.2	0.4	5.8	0.5	8.4	0	0.4	16.5	8	14.8	0.4	5.6	4.5	139.1	104.1	2.3	1.6	1.6	4.5	40	0.1	22.8	309	1	12.2	297.2	79	14	187	11	21	1.9
1	1.4	25	2	9	5	4.8	85	26.8	292	55.4	17.7	319	27.1	27.1	3	59.8	1.7	34.2	0.2	4.9	0	0.6	0	0.4	30.9	9.5	14.5	0.5	4.6	4.4	139.7	104.4	3	0.9	1.6	4.7	42.4	0.1	21.9	296.3	0.9	12.6	297.9	100.6	17.5	227.5	18	27.3	2.1
1	1.32	23.8	2	9	7.3	5.6	99	33.1	434	58.8	17.5	298	47.3	22	4.1	55.8	2.6	35	0.5	6.7	0.2	2.2	0	0.3	44	11.3	15.5	0.5	4.6	4.4	139.7	104.4	3	0.9	1.6	4.7	42.4	0.1	21.9	296.3	0.9	12.6	297.9	100.6	17.5	227.5	18	27.3	2.1
3	1.37	24	1	9	6.5	0.7	102	33.7	481	50.5	15.3	303	39.7	21.4	3.9	60.3	2.1	31.9	0.4	5.3	0.1	2.1	0	0.4	38.6	10.3	14.5	0.5	3.7	5.4	140	105	2.4	0.9	1.7	8.5	43	0.1	17.9	276	0.9	12.6	297.9	94	28	282	18	33	2.1
1	1.41	30	2	9	5.4	5.8	89	28.2	314	49	15.5	317	37.3	21.6	2.7	49.1	2.3	41.8	0.4	6.8	0.1	1.7	0	0.5	27.1	9.2	14.4	0.4	3.8	4.4	139.9	103.5	2.6	1	1.6	5.7	33	0.2	25.5	276	0.9	10.9	298.1	104	16.7	179	13	30	2.3
3	1.38	25	1	9	6.8	6.4	97	32.2	601	50.2	15.1	300	40.5	21.9	2.7	39.9	3.2	47.2	0.5	7.1	0.4	5.6	0	0.2	30.3	9.5	14.9	0.6	3.3	4.8	136	102	2.5	1	1.9	4.6	40	0.1	18.2	274	0.9	12.6	297.9	76	31	224	21	28	2.1
1	1.41	28.4	1	10	10.8	5.8	93	28.9	282	49.6	15.9	321	35.1	20	6.7	62.1	2.9	26.5	0.7	6.5	0.4	4.1	0.1	0.6	23.7	8.9	14.5	0.3	4.8	4.3	138.6	104.5	2.7	1	1.8	5.1	27.8	0.2	23.9	359	0.9	10.2	295.7	123	12.8	220	15	31	2.1
1	1.4	25	2	10	4.8	5.4	109	35.3	220	65.1	20	307	72.7	32.1	2.5	51.8	2	41.7	0.3	5.4	0	0.7	0	0.4	37.5	10	14.1	0.4	3.5	5.4	139.6	104	2.3	0.8	1.8	3.6	23.5	0.2	22.3	219	0.7	13.3	297.1	100	16.9	222	14	28	2
3	1.38	26	2	11	6.5	4.3	89	33	276	76.5	20.6	269	53	19.1	3.2	49.1	2.6	39.8	0.4	6.1	0.3	4.2	0	0.6	36.2	10.6	16	0.3	3.6	4.2	140.7	105.1	2.6	1.1	1.3	4.4	19.3	0.2	25.1	397	0.7	10.5	297.7	46	11.4	505	16	36	2.3
1	1.41	25	2	11	6.7	4.9	83	28.7	422	58.9	17	288	72.6	34.6	3.1	45.9	3.2	47.4	0.4	5.3	0.1	1	0	0.4	23.3	9	14.3	0.4	3.1	4.3	144	107	2.5	1	2.1	3.4	30	0.1	22.1	261	0.9	12.6	297.9	39	16	334	13	22	2.1
3	1.43	28	1	11	6.3	6.3	100	31.7	569	50.1	15.8	316	36.5	19.8	3	48.1	2.5	40	0.5	7.2	0.3	4.3	0	0.4	32.6	9.9	14.9	0.6	4.4	5.2	140	103	2.4	1	1.7	2.4	43	0.1	22.8	319	0.9	12.6	297.9	37	17	162	10	19	2.1
3	1.6	30.2	2	11	5.8	6.1	109	38.1	352	62.2	17.7	285	51.2	22.3	2.3	39.8	3.1	52.5	0.4	6.3	1.1	2.3	0	0.3	42.3	10.9	15.2	0.4	2.6	4.5	138	103	2.4	0.9	1.7	3.1	39	0.1	21	217	0.9	12.6	297.9	71	16	294	9	22	2.1
3	1.42	29.9	1	11	7	6.4	127	41.2	499	64.6	19.9	309	36.4	15.1	3.8	54.1	2.6	36.3	0.5	7.2	0.2	2.3	0	0.1	32.4	10.2	15.8	0.5	3	4.8	137	100	2.5	0.9	1.6	3.8	46	0.1	21.6	492	0.9	12.6	297.9	72	28	214	10	20	2.1
1	1.51	30	1	12	8.9	6	99	31.8	271	53.3	16.7	313	38.9	20.5	3.9	43.5	2.9	32.8	0.7	7.9	1.3	14.1	0.2	1.6	27.2	9.4	14.6	0.3	4.6	4.8	139.4	105	2.6	1	1.6	4.7	38.4	0.1	25.9	392	0.8	8.5	297.7	159	15.7	199	18	29	1.6
3	1.39	26	2	12	7.7	4.4	99	36.5	232	83.3	22.5	271	62.2	20	4.2	55.2	2.6	34.1	0.6	8	0.2	2.7	0	0	26.1	10.1	15.8	0.2	4.6	3.8	142.8	106.3	2.4	0.9	1.6	3.9	40	0.1	21.9	344	0.7	12.6	297.9	57	12	227.5	33	42	2.1
1	1.61	34.2	2	13	8.2	5	85	28.3	325	56.3	17	302	40.5	20.5	4	48.5	3.3	40.4	0.6	7.3	0.3	3.2	0	0.4	29.7	9.4	14.6	0.4	3.9	4.1	137.9	106.2	2.4	0.9	1.4	3.7	63.6	0.1	21	257	0.9	10.7	291.5	21	9.3	186	6	17	2.8
3	1.61	32.6	2	13	7.5	5.8	101	33.5	400	57.5	17.4	302	44.3	20.9	5.3	71.3	1.5	20.2	0.5	6.8	0.1	1.5	0	0.2	32.5	9.9	14.9	0.4	3.2	4.6	137	103	2.4	1.1	1.5	3.1	49	0.1	18.8	231	0.9	12.6	297.9	57	16	255	10	20	2.1
1	1.4	37	2	14	6.2	4.8	80	25.9	298	54.1	16.6	307	39.6	20.3	3.4	54.8	2.4	38.1	0.3	4.8	0.1	1.7	0	0.5	31.2	9.6	14.9	0.4	4.3	3.9	141.9	106.5	2.4	0.9	1.2	3.4	43.9	0.1	23.4	436	0.8	12	299.3	42	6.2	146	8	17	2.1
1	1.5	37.4	2	15	6.9	5.7	119	39	72	67.9	20.7	305	35.7	14.3	4.5	64.4	2.1	30.8	0.2	3	0.1	1.5	0	0.3	38.5	10.8	16.6	0.1	3.1	4	138	102	2.4	0.9	1.2	4.4	47	0.1	18.7	365	0.9	12.6	297.9	178	16	233	23	18	2.1
1	1.51	42.8	2	17	9.6	4.1	97	30.5	169	73.5	23.4	318	62.9	22.9	4.3	44.9	4.1	43	0.5	5	0.6	5.7	0.1	0.5	32	9.6	14.6	0.2	4	3.6	140.4	103.1	2.3	1	1.3	5.6	44.6	0.1	25.3	295	1.2	12	297.5	18	7.6	229	11	15	1.4
1	1.55	50	2	17	2.2	3.7	95	29.2	156	78.3	25.5	326	50	17.8	1.1	49.9	0.9	38.1	0.2	9.8	0	1.1	0	0.7	45.1	11.7	15.7	0.2	4.8	3.1	137.6	106.1	2	1.1	0.5	4.9	55.7	0.1	22.9	136	1.3	8.6	291.1	45	9.2	510	47	71	1.5
3	1.53	50.4	2	17	5.9	4.9	95	39	203	79.8	19.5	244	94.5	32.6	4.2	71.5	1.3	22.7	0.3	4.2	0.1	1.3	0	0.3	32.4	9.5	14.8	0.2	2.1	4.1	139	102	2.4	1.1	1.6	5.6	32	0.1	16.5	375	0.9	12.6	297.9	26	10	653	12	30	2.1
1	1.54	50.1	2	18	7.1	3.9	99	31.6	306	80.1	25.1	314	61	20.7	3.9	54.6	2.8	39.7	0.3	3.5	0.2	2.1	0	0.1	61.8	15	16.6	0.5	4.2	4	137	107	212	1	1.6	40	5.8	0.1	20.1	174	0.9	12.6	297.9	29	10	221	14	16	2.1
[truncated: 27 more columns]
